# Supplementary material for: Analysis of circRNA expression in chicken HD11 cells in response to avian pathogenic E.coli
Source: Front Vet Sci. 2022 Sep 15;9:1005899. doi: 10.3389/fvets.2022.1005899 (PMC9521048; doi:10.3389/fvets.2022.1005899)
Supplement: Supplementary file 5 [file Table_5.XLS]

## Sheet: Sheet1
Table 5 The circRNA-miRNA interaction
miRNA	Target_circRNA	Tot_Score	Tot_Energy	Max_Score	Max_Energy	miRNA_length	Target_circRNA_length	Positions
novel_65	7:30699299-30701196	177	-30.15	177	-30.15	25	244	166
gga-miR-6599-5p	6:16997989-17005138	145	-20.9	145	-20.9	24	584	478
novel_923	20:1404151-1406715	161	-22.41	161	-22.41	23	422	116
novel_467	4:65097900-65102412	148	-20.35	148	-20.35	22	894	474
novel_605	3:107147300-107151497	140	-24.28	140	-24.28	24	522	117
gga-miR-6597-3p	4:5093850-5096145	162	-28.08	162	-28.08	24	550	189
gga-miR-6609-3p	1:15272024-15339851	151	-28.15	151	-28.15	23	642	150
novel_936	3:104232958-104234270	154	-23.07	154	-23.07	20	413	71
novel_919	14:6667631-6690566	141	-22.21	141	-22.21	23	3864	612
gga-miR-6646-3p	21:3691802-3694190	160	-27.11	160	-27.11	22	560	278
novel_865	16:2733248-2734870	294	-40.69	154	-21.35	22	335	281 298
novel_284	30:538735-539347	153	-31.62	153	-31.62	23	225	64
novel_238	1:56932512-56949904	159	-20.21	159	-20.21	24	1301	594
gga-miR-1687-5p	14:6667631-6690566	167	-20.38	167	-20.38	21	3864	1697
gga-miR-18b-3p	14:6667631-6690566	149	-22.34	149	-22.34	25	3864	1754
gga-miR-456-3p	14:13807324-13807958	153	-26.26	153	-26.26	22	547	269
novel_796	14:6667631-6690566	147	-21.2	147	-21.2	22	3864	754
novel_782	14:13807324-13807958	316	-47.02	160	-25.18	21	547	456 134
novel_549	1:107983050-107986514	167	-20.21	167	-20.21	22	423	95
novel_715	1:56932512-56949904	146	-21.41	146	-21.41	22	1301	1275
gga-miR-6566-3p	18:4180338-4182886	151	-21.49	151	-21.49	21	699	333
gga-miR-6587-5p	2:64684729-64686182	165	-24.15	165	-24.15	23	282	225
gga-miR-6690-5p	14:13807324-13807958	149	-21.92	149	-21.92	23	547	293
novel_452	3:104232958-104234270	157	-26.82	157	-26.82	23	413	262
gga-miR-7460-3p	4:5093850-5096145	150	-20.99	150	-20.99	22	550	284
gga-miR-1552-3p	1:79079526-79092394	167	-23.83	167	-23.83	21	406	184
novel_660	20:1404151-1406715	153	-22.94	153	-22.94	25	422	157
gga-miR-6637-3p	14:6667631-6690566	153	-21.14	153	-21.14	23	3864	3828
novel_364	21:6349960-6361958	152	-20.16	152	-20.16	22	597	198
novel_198	14:6667631-6690566	474	-64.27	169	-23.95	24	3864	1697 2035 3333
novel_764	4:89908603-89918509	300	-36.17	153	-23.03	22	556	129 2
novel_922	2:64684729-64686182	324	-48.11	164	-25.88	23	282	107 166
gga-miR-1723	16:2733248-2734870	146	-21.47	146	-21.47	23	335	198
novel_97	Z:9501366-9504669	155	-23.08	155	-23.08	23	444	156
gga-miR-7456-3p	1:15272024-15339851	144	-21.38	144	-21.38	22	642	204
novel_864	14:13807324-13807958	149	-27.37	149	-27.37	20	547	45
novel_69	2:64703915-64711715	163	-25.65	163	-25.65	23	577	372
novel_595	21:6349960-6361958	158	-22.48	158	-22.48	22	597	199
gga-miR-6586-5p	21:3691802-3694190	147	-22.18	147	-22.18	23	560	35
novel_287	2:64703915-64711715	152	-21.26	152	-21.26	22	577	494
novel_193	6:36302501-36309401	151	-21.48	151	-21.48	22	520	354
gga-miR-6647-5p	14:6667631-6690566	149	-24.09	149	-24.09	23	3864	122
novel_701	10:12132977-12161781	155	-24.7	155	-24.7	19	1939	1918
gga-miR-1454	14:6667631-6690566	164	-26.22	164	-26.22	24	3864	989
gga-miR-6569-3p	21:3691802-3694190	144	-21.54	144	-21.54	23	560	396
novel_178	10:8044919-8049376	152	-21.23	152	-21.23	23	583	526
novel_289	16:2733248-2734870	321	-70.55	166	-36.29	18	335	302 286
gga-miR-6623-3p	15:6681541-6682012	146	-20.07	146	-20.07	22	366	66
gga-miR-6587-5p	14:6667631-6690566	322	-53.66	163	-27.1	23	3864	3007 3703
novel_56	10:18596448-18598792	164	-24.2	164	-24.2	23	471	253
novel_713	10:8044919-8049376	152	-22.03	152	-22.03	22	583	535
gga-miR-7452-3p	Z:9501366-9504669	147	-30.4	147	-30.4	26	444	255
gga-miR-1728-3p	21:3691802-3694190	156	-20.65	156	-20.65	22	560	189
novel_236	4:65097900-65102412	150	-22.44	150	-22.44	23	894	577
novel_888	6:16997989-17005138	158	-24.06	158	-24.06	25	584	313
novel_240	10:8044919-8049376	154	-21.76	154	-21.76	22	583	326
gga-miR-6605-5p	14:6667631-6690566	762	-91.98	164	-25.14	23	3864	2854 2760 3384 1928 2279
novel_427	Z:9501366-9504669	153	-23.08	153	-23.08	22	444	157
novel_946	21:3691802-3694190	164	-24.65	164	-24.65	22	560	65
novel_508	21:6349960-6361958	153	-26.2	153	-26.2	24	597	461
gga-miR-1754-5p	6:36302501-36309401	157	-20.36	157	-20.36	20	520	177
gga-miR-15a	14:6667631-6690566	157	-21.32	157	-21.32	21	3864	2613
gga-miR-1670	5:50719738-50729260	145	-20.21	145	-20.21	22	336	137
gga-miR-1769-3p	4:12532765-12540210	156	-22.29	156	-22.29	23	285	125
novel_732	KZ626826.1:7149-7526	150	-24.78	150	-24.78	22	285	97
gga-miR-1762	1:72888896-72939506	141	-21.8	141	-21.8	24	791	93
novel_907	4:89913504-89918509	158	-23.04	158	-23.04	23	390	63
novel_91	2:881177-884854	153	-23.72	153	-23.72	22	405	168
gga-miR-6570-5p	2:120915124-120916022	159	-21.12	159	-21.12	24	898	624
novel_605	2:64703915-64711715	146	-21.02	146	-21.02	24	577	456
novel_161	4:5093850-5096145	156	-26.91	156	-26.91	22	550	434
gga-miR-6560-3p	2:881177-884854	146	-20.8	146	-20.8	24	405	299
gga-miR-6706-5p	3:104232958-104234270	158	-20.64	158	-20.64	22	413	39
gga-miR-1774	18:4180338-4182886	154	-28.81	154	-28.81	21	699	496
gga-miR-184-5p	10:12132977-12161781	163	-26.4	163	-26.4	23	1939	123
novel_146	Z:9501366-9504669	163	-25.74	163	-25.74	22	444	242
novel_872	30:538735-539347	155	-26.86	155	-26.86	20	225	131
novel_82	14:13807324-13807958	156	-23.7	156	-23.7	23	547	8
gga-miR-6677-5p	14:6667631-6690566	150	-23.88	150	-23.88	25	3864	1753
gga-miR-6589-5p	14:6667631-6690566	323	-41.49	166	-23.62	23	3864	1467 2905
gga-miR-6674-3p	2:64684729-64686182	143	-23.08	143	-23.08	21	282	117
novel_217	4:89913504-89918509	156	-23.04	156	-23.04	21	390	65
novel_45	10:12132977-12161781	140	-21.41	140	-21.41	22	1939	242
novel_758	1:61812485-61813589	165	-28.02	165	-28.02	23	268	199
novel_978	3:110013980-110042321	163	-32.61	163	-32.61	19	831	733
novel_183	1:56932512-56949904	147	-22.11	147	-22.11	22	1301	595
gga-miR-1618-3p	14:13807324-13807958	146	-22.39	146	-22.39	22	547	477
novel_688	20:1404151-1406715	144	-21.06	144	-21.06	22	422	345
novel_443	1:15272024-15339851	160	-22.64	160	-22.64	18	642	129
gga-miR-1765	14:6667631-6690566	153	-25.01	153	-25.01	20	3864	2600
gga-miR-6543-3p	20:1404151-1406715	154	-23.69	154	-23.69	18	422	242
gga-miR-9-5p	1:79079526-79092394	156	-20.64	156	-20.64	23	406	57
novel_957	30:538735-539347	155	-24.25	155	-24.25	20	225	131
novel_348	16:2733248-2734870	147	-20.54	147	-20.54	23	335	183
novel_80	14:6667631-6690566	293	-35.6	150	-22.89	24	3864	205 3587
novel_69	5:50719738-50729260	140	-25.35	140	-25.35	23	336	230
novel_389	14:6667631-6690566	140	-20.32	140	-20.32	22	3864	116
novel_484	14:13807324-13807958	293	-40.38	150	-21.32	23	547	69 24
novel_725	5:17348967-17351158	295	-40.21	149	-22.59	22	526	359 147
novel_57	18:4180338-4182886	153	-26.07	153	-26.07	22	699	238
gga-miR-6557-5p	KZ626826.1:7149-7526	165	-36.51	165	-36.51	20	285	175
gga-miR-6670-5p	14:6667631-6690566	154	-20.68	154	-20.68	26	3864	1330
gga-miR-1785	18:4180338-4182886	156	-20.31	156	-20.31	22	699	283
gga-miR-7455-3p	5:50719738-50729260	158	-28.33	158	-28.33	23	336	193
novel_150	19:8563661-8565823	165	-24.16	165	-24.16	22	569	161
novel_814	4:89908603-89918509	170	-20.24	170	-20.24	24	556	480
novel_536	KZ626826.1:7149-7526	151	-20.54	151	-20.54	23	285	173
novel_739	18:4180338-4182886	142	-24.71	142	-24.71	22	699	138
novel_919	20:1404151-1406715	315	-44.15	159	-26.01	23	422	371 147
novel_853	14:6667631-6690566	140	-22.71	140	-22.71	21	3864	1858
novel_718	14:6667631-6690566	148	-23.66	148	-23.66	23	3864	3441
gga-miR-6554-3p	Z:7450000-7475226	168	-20.27	168	-20.27	22	773	91
novel_723	Z:7450000-7475226	149	-25.28	149	-25.28	22	773	584
novel_244	1:56932512-56949904	162	-25.59	162	-25.59	18	1301	135
gga-miR-1681	1:56932512-56949904	163	-20.55	163	-20.55	22	1301	532
novel_795	14:6667631-6690566	147	-20.22	147	-20.22	19	3864	2233
novel_605	3:110013980-110042321	159	-21.74	159	-21.74	24	831	739
novel_198	14:13807324-13807958	156	-22.78	156	-22.78	24	547	370
novel_299	1:56932512-56949904	471	-54.69	164	-20.44	23	1301	1112 153 728
novel_970	14:6667631-6690566	161	-26.26	161	-26.26	21	3864	3341
novel_675	Z:7450000-7475226	165	-26.59	165	-26.59	22	773	334
gga-miR-1679	14:6667631-6690566	328	-44.21	173	-25.71	23	3864	3429 433
novel_980	14:6667631-6690566	296	-38.09	150	-21.04	21	3864	3285 3126
gga-miR-107-3p	4:5093850-5096145	154	-22.5	154	-22.5	23	550	313
gga-miR-6577-5p	Z:9501366-9504669	165	-22.39	165	-22.39	23	444	384
novel_971	19:8563661-8565823	302	-41.24	152	-23.77	22	569	505 184
gga-miR-7442-3p	2:8746306-8750639	157	-20.8	157	-20.8	21	390	152
novel_720	14:13807324-13807958	145	-20.64	145	-20.64	22	547	265
novel_152	3:107147300-107151497	445	-59.84	155	-20.65	23	522	214 332 454
novel_199	14:13807324-13807958	153	-26.26	153	-26.26	23	547	268
novel_292	Z:9501366-9504669	151	-21.4	151	-21.4	23	444	346
gga-miR-6549-5p	2:8746306-8750639	168	-21.61	168	-21.61	23	390	239
novel_182	15:6681541-6682012	166	-22.93	166	-22.93	22	366	55
novel_847	2:64703915-64711715	166	-21.73	166	-21.73	23	577	441
gga-miR-6620-5p	2:17975751-17985248	153	-26.23	153	-26.23	23	919	55
gga-miR-6550-3p	15:6681541-6682012	148	-21.74	148	-21.74	22	366	308
gga-miR-215-3p	1:15272024-15339851	440	-48.9	147	-21.32	23	642	301 507 1
gga-miR-1466	3:107147300-107151497	145	-24.64	145	-24.64	24	522	105
novel_544	1:56932512-56949904	160	-23.78	160	-23.78	19	1301	8
novel_764	21:3691802-3694190	161	-21.27	161	-21.27	22	560	57
gga-miR-3594-3p	3:110013980-110042321	295	-44.12	150	-26.61	22	831	511 14
novel_436	18:4180338-4182886	141	-22.47	141	-22.47	20	699	165
gga-miR-3532-5p	1:193881978-193887114	172	-20.66	172	-20.66	22	453	124
novel_55	5:17348967-17351158	317	-44.16	162	-22.74	23	526	209 412
novel_709	19:8563661-8565823	149	-25.52	149	-25.52	23	569	392
gga-miR-4732-5p	14:6667631-6690566	146	-23.93	146	-23.93	21	3864	2734
novel_177	14:6667631-6690566	168	-24.74	168	-24.74	23	3864	658
gga-miR-2130	1:79079526-79092394	148	-24.05	148	-24.05	23	406	192
gga-miR-107-5p	2:881177-884854	167	-20.12	167	-20.12	23	405	321
novel_636	30:538735-539347	308	-57.32	155	-29.04	24	225	115 125
gga-miR-1596-5p	1:72888896-72939506	172	-22.46	172	-22.46	23	791	534
novel_899	3:110013980-110042321	151	-22.39	151	-22.39	20	831	439
gga-miR-1680-5p	3:107147300-107151497	283	-40.37	143	-23.37	22	522	138 179
novel_189	14:6667631-6690566	307	-44.81	154	-24.08	23	3864	713 1767
novel_901	18:4180338-4182886	153	-26.41	153	-26.41	25	699	368
novel_343	KZ626826.1:7149-7526	159	-32.17	159	-32.17	22	285	160
novel_801	2:64703915-64711715	143	-23.92	143	-23.92	23	577	491
gga-miR-15c-5p	1:72888896-72939506	157	-21.5	157	-21.5	22	791	451
gga-miR-1569	4:5093850-5096145	150	-20.29	150	-20.29	22	550	507
novel_972	18:4180338-4182886	160	-35.01	160	-35.01	19	699	325
novel_65	1:15272024-15339851	300	-43.77	152	-22.55	25	642	501 586
novel_361	1:56932512-56949904	171	-29.51	171	-29.51	23	1301	1229
gga-miR-6598-5p	6:16997989-17005138	161	-21.74	161	-21.74	21	584	489
novel_246	14:6667631-6690566	148	-22.31	148	-22.31	22	3864	3711
gga-miR-6607-5p	4:65097900-65102412	157	-23.88	157	-23.88	24	894	543
gga-miR-3537	14:6667631-6690566	160	-25.09	160	-25.09	23	3864	3563
novel_523	30:538735-539347	157	-27.59	157	-27.59	22	225	116
novel_502	2:64684729-64686182	152	-20.68	152	-20.68	23	282	27
novel_133	2:17975751-17985248	306	-37.03	164	-22.42	23	919	541 394
gga-miR-1564-3p	6:30450791-30452406	156	-21.88	156	-21.88	22	906	31
novel_808	7:15032338-15040086	162	-21.36	162	-21.36	20	280	167
novel_692	14:13807324-13807958	154	-22.37	154	-22.37	22	547	129
novel_364	2:120915124-120916022	180	-31.95	180	-31.95	22	898	74
novel_9	2:120915124-120916022	167	-20.6	167	-20.6	21	898	765
gga-miR-1453	14:13807324-13807958	162	-29.89	162	-29.89	23	547	41
gga-miR-34a-3p	14:6667631-6690566	162	-21.12	162	-21.12	23	3864	1614
novel_811	16:2733248-2734870	290	-39.89	150	-20.35	23	335	20 63
novel_152	14:6667631-6690566	159	-26.12	159	-26.12	23	3864	1680
novel_242	14:13807324-13807958	156	-22.61	156	-22.61	20	547	91
novel_971	10:12132977-12161781	425	-50.31	145	-22.94	22	1939	723 106 889
gga-miR-6550-3p	3:105140077-105142087	162	-21.67	162	-21.67	22	383	182
gga-miR-6587-3p	14:6667631-6690566	342	-49.55	177	-26.24	23	3864	2844 1584
novel_466	16:2733248-2734870	172	-35.33	172	-35.33	23	335	33
gga-miR-1646	1:15272024-15339851	299	-44.28	159	-23.58	23	642	83 236
novel_50	10:8044919-8049376	146	-20.82	146	-20.82	24	583	270
novel_401	20:1404151-1406715	174	-26.89	174	-26.89	22	422	286
gga-miR-6696-5p	2:17975751-17985248	155	-20.11	155	-20.11	22	919	253
gga-miR-196-2-3p	10:18596448-18598792	151	-20.8	151	-20.8	22	471	192
gga-miR-6564-5p	30:538735-539347	155	-28.89	155	-28.89	21	225	68
gga-miR-1562-5p	14:6667631-6690566	162	-26.59	162	-26.59	22	3864	340
gga-miR-1654	1:15272024-15339851	148	-21.97	148	-21.97	21	642	172
gga-miR-2129	18:4180338-4182886	144	-20.63	144	-20.63	23	699	633
novel_2	Z:7450000-7475226	166	-22.47	166	-22.47	24	773	262
gga-miR-7455-3p	Z:36839947-36841327	151	-23.84	151	-23.84	23	360	186
novel_791	5:17348967-17351158	315	-43.87	160	-24.33	21	526	359 146
gga-miR-1626-3p	16:2733248-2734870	168	-25.52	168	-25.52	22	335	61
novel_882	7:15032338-15040086	145	-21.93	145	-21.93	21	280	144
novel_50	21:3691802-3694190	151	-20.84	151	-20.84	24	560	137
gga-miR-6623-3p	14:6667631-6690566	300	-37.14	159	-21.41	22	3864	3751 130
novel_488	4:5093850-5096145	152	-30.06	152	-30.06	21	550	513
novel_584	1:72888896-72939506	170	-22.04	170	-22.04	23	791	140
novel_520	1:79079526-79092394	283	-34.82	143	-20.45	22	406	164 305
gga-miR-1649-5p	18:4180338-4182886	155	-22.93	155	-22.93	20	699	345
novel_497	2:120915124-120916022	163	-26.01	163	-26.01	21	898	177
novel_916	14:6667631-6690566	297	-32.42	151	-20.95	21	3864	3280 1879
novel_685	16:2733248-2734870	151	-24.65	151	-24.65	24	335	186
gga-miR-6664-3p	18:4180338-4182886	171	-29.87	171	-29.87	22	699	340
gga-miR-6584-5p	3:110013980-110042321	154	-24.47	154	-24.47	23	831	244
gga-miR-6648-3p	4:89913504-89918509	156	-23.04	156	-23.04	21	390	65
gga-miR-1649-5p	3:107147300-107151497	444	-56.95	154	-20.65	20	522	217 335 457
novel_776	1:56932512-56949904	291	-37.61	151	-21.46	23	1301	722 1127
gga-miR-128-1-5p	30:538735-539347	286	-48.5	145	-26.63	23	225	117 126
gga-miR-1580	21:3691802-3694190	148	-20.86	148	-20.86	21	560	190
novel_522	1:193881978-193887114	143	-22.01	143	-22.01	22	453	416
gga-miR-133b	18:4180338-4182886	304	-45.42	153	-22.76	21	699	123 503
novel_69	10:12132977-12161781	156	-20.85	156	-20.85	23	1939	504
novel_973	3:107147300-107151497	153	-20.82	153	-20.82	22	522	328
gga-miR-6593-5p	16:2733248-2734870	165	-33.61	165	-33.61	23	335	199
novel_171	2:120915124-120916022	152	-22.1	152	-22.1	25	898	521
gga-miR-1654	4:5093850-5096145	155	-21.7	155	-21.7	21	550	397
gga-miR-1453	21:3122687-3126565	151	-20.2	151	-20.2	23	308	178
gga-miR-301b-5p	4:65097900-65102412	159	-22.61	159	-22.61	22	894	338
novel_676	4:89908603-89918509	159	-23.04	159	-23.04	24	556	228
novel_514	14:6667631-6690566	152	-20.28	152	-20.28	22	3864	182
novel_690	14:6667631-6690566	166	-20.05	166	-20.05	21	3864	1761
gga-miR-1747-3p	5:17348967-17351158	153	-22.28	153	-22.28	22	526	407
novel_792	4:89908603-89918509	150	-20.15	150	-20.15	22	556	85
novel_515	10:12132977-12161781	150	-22.25	150	-22.25	19	1939	1440
novel_879	2:17975751-17985248	151	-21.44	151	-21.44	22	919	397
novel_502	4:89908603-89918509	165	-22.4	165	-22.4	23	556	371
gga-miR-6549-5p	14:6667631-6690566	156	-24.28	156	-24.28	23	3864	2111
gga-miR-1668-5p	Z:7450000-7475226	153	-24.48	153	-24.48	22	773	587
novel_671	Z:7450000-7475226	142	-20.22	142	-20.22	22	773	640
novel_264	1:15272024-15339851	445	-55.76	153	-21.85	21	642	484 370 424
novel_665	21:3122687-3126565	165	-24.77	165	-24.77	23	308	226
novel_332	14:6667631-6690566	159	-25.51	159	-25.51	23	3864	704
novel_44	14:13807324-13807958	152	-22.62	152	-22.62	22	547	366
novel_65	1:12744003-12750283	147	-21.25	147	-21.25	25	393	238
novel_183	6:30450791-30452406	156	-21.97	156	-21.97	22	906	238
gga-miR-6597-3p	10:12132977-12161781	291	-48.31	146	-24.92	24	1939	63 1136
novel_575	2:64703915-64711715	150	-21.22	150	-21.22	22	577	542
gga-miR-1591-3p	10:8044919-8049376	151	-20.15	151	-20.15	21	583	217
novel_722	4:65097900-65102412	153	-20.83	153	-20.83	22	894	753
gga-miR-365-2-5p	19:8563661-8565823	147	-20.24	147	-20.24	23	569	444
novel_392	2:64703915-64711715	154	-20.25	154	-20.25	24	577	165
novel_677	14:6667631-6690566	151	-20.1	151	-20.1	25	3864	1627
gga-miR-6698-3p	14:6667631-6690566	157	-20.06	157	-20.06	23	3864	156
novel_452	2:17975751-17985248	147	-26.39	147	-26.39	23	919	512
gga-miR-1762	Z:9501366-9504669	152	-21.43	152	-21.43	24	444	212
gga-miR-6554-3p	2:64703915-64711715	160	-20.77	160	-20.77	22	577	367
novel_43	Z:9501366-9504669	156	-27.08	156	-27.08	23	444	150
novel_546	18:4180338-4182886	154	-23.93	154	-23.93	19	699	303
novel_828	6:30450791-30452406	160	-25.28	160	-25.28	23	906	776
novel_63	1:193881978-193887114	168	-24.09	168	-24.09	22	453	292
novel_806	3:104232958-104234270	158	-25.79	158	-25.79	22	413	98
novel_887	2:120915124-120916022	163	-26.01	163	-26.01	22	898	176
novel_719	16:2733248-2734870	155	-24.46	155	-24.46	22	335	156
gga-miR-1668-3p	10:18596448-18598792	152	-20.72	152	-20.72	21	471	144
novel_630	20:1404151-1406715	150	-23.1	150	-23.1	23	422	16
novel_621	21:3122687-3126565	146	-22.66	146	-22.66	21	308	286
novel_723	16:2733248-2734870	153	-29.18	153	-29.18	22	335	14
gga-miR-1724	3:110013980-110042321	150	-21.58	150	-21.58	23	831	739
novel_364	4:5093850-5096145	294	-40.87	148	-21.34	22	550	186 270
gga-miR-1751-5p	5:17348967-17351158	161	-22.83	161	-22.83	23	526	441
novel_722	6:36302501-36309401	157	-20.42	157	-20.42	22	520	177
novel_847	10:18596448-18598792	164	-21.67	164	-21.67	23	471	425
novel_417	18:4180338-4182886	151	-22.36	151	-22.36	22	699	332
gga-miR-6654-3p	19:8563661-8565823	153	-25.57	153	-25.57	23	569	407
novel_152	10:12132977-12161781	294	-42.74	151	-22.34	23	1939	1133 438
novel_433	16:2733248-2734870	171	-34.05	171	-34.05	18	335	303
novel_735	4:65097900-65102412	144	-23.08	144	-23.08	20	894	72
novel_856	4:5093850-5096145	320	-51.69	161	-25.86	22	550	406 469
novel_288	10:12132977-12161781	155	-24.65	155	-24.65	21	1939	1627
novel_578	10:8044919-8049376	147	-20.22	147	-20.22	21	583	535
novel_646	3:110013980-110042321	171	-30.33	171	-30.33	22	831	102
novel_388	7:8060373-8061624	162	-20.44	162	-20.44	19	272	29
gga-miR-6663-5p	4:65097900-65102412	148	-25.7	148	-25.7	21	894	224
gga-miR-365-1-5p	14:6667631-6690566	143	-21.66	143	-21.66	23	3864	3511
gga-miR-1612	3:110013980-110042321	159	-20.87	159	-20.87	22	831	451
novel_980	6:30450791-30452406	438	-58.68	150	-22.52	21	906	496 364 524
novel_300	4:65097900-65102412	151	-20.99	151	-20.99	23	894	862
gga-miR-6550-3p	3:110013980-110042321	146	-22.68	146	-22.68	22	831	412
gga-miR-1569	19:8563661-8565823	162	-21.72	162	-21.72	22	569	172
novel_407	3:110013980-110042321	165	-21.89	165	-21.89	23	831	261
gga-miR-1663-5p	21:3691802-3694190	163	-25.58	163	-25.58	20	560	341
novel_831	7:8060373-8061624	153	-21.33	153	-21.33	24	272	98
novel_75	10:12132977-12161781	160	-23.89	160	-23.89	22	1939	1638
novel_885	10:12132977-12161781	153	-21.45	153	-21.45	21	1939	1135
gga-miR-6569-5p	14:6667631-6690566	143	-20.03	143	-20.03	23	3864	3074
novel_44	14:6667631-6690566	310	-44.33	155	-22.43	22	3864	1697 3330
novel_805	14:13807324-13807958	162	-34.6	162	-34.6	22	547	85
gga-miR-1564-3p	3:110013980-110042321	151	-20.23	151	-20.23	22	831	683
gga-miR-1650	2:17975751-17985248	316	-45.46	169	-25.97	24	919	262 208
gga-miR-1760	3:110013980-110042321	155	-21.65	155	-21.65	23	831	398
gga-miR-1562-3p	Z:7450000-7475226	167	-30.73	167	-30.73	22	773	57
novel_364	KZ626826.1:7149-7526	153	-22.56	153	-22.56	22	285	224
novel_433	14:6667631-6690566	151	-23.3	151	-23.3	18	3864	126
gga-miR-6629-5p	4:5093850-5096145	157	-21.18	157	-21.18	26	550	501
gga-miR-103-3p	4:5093850-5096145	154	-24.65	154	-24.65	23	550	313
novel_299	1:193881978-193887114	147	-22.91	147	-22.91	23	453	94
gga-miR-6662-3p	15:6681541-6682012	160	-21.28	160	-21.28	22	366	286
novel_846	4:65097900-65102412	167	-21.27	167	-21.27	22	894	763
gga-miR-1724	3:107147300-107151497	145	-22.89	145	-22.89	23	522	119
novel_605	7:15032338-15040086	143	-20.56	143	-20.56	24	280	160
novel_774	Z:9501366-9504669	141	-20.99	141	-20.99	22	444	114
novel_622	1:56932512-56949904	154	-21.68	154	-21.68	18	1301	728
gga-miR-6566-3p	4:65097900-65102412	154	-23.46	154	-23.46	21	894	698
gga-miR-1676-5p	18:4180338-4182886	147	-20.2	147	-20.2	22	699	546
gga-miR-1656	Z:9501366-9504669	150	-21.88	150	-21.88	22	444	243
novel_943	1:79079526-79092394	146	-20.34	146	-20.34	22	406	284
novel_363	14:13807324-13807958	290	-38.86	147	-21.32	22	547	69 25
novel_181	14:6667631-6690566	745	-84.34	154	-23.83	23	3864	3059 1411 570 2835 303
novel_419	10:12132977-12161781	304	-35.01	153	-21.64	22	1939	61 1583
gga-miR-365-3p	10:18596448-18598792	164	-24.32	164	-24.32	22	471	203
gga-miR-6602-5p	14:6667631-6690566	165	-26.08	165	-26.08	22	3864	3614
novel_288	4:65097900-65102412	161	-25.03	161	-25.03	21	894	227
novel_260	14:6667631-6690566	629	-76.33	168	-29.3	23	3864	3355 545 287 1799
novel_24	1:15272024-15339851	147	-21.11	147	-21.11	22	642	127
novel_174	14:6667631-6690566	297	-34.46	151	-22.99	23	3864	3278 1877
gga-miR-6709-5p	14:13807324-13807958	152	-25.48	152	-25.48	25	547	475
novel_419	14:6667631-6690566	151	-23.81	151	-23.81	22	3864	3321
novel_305	14:13807324-13807958	168	-29.46	168	-29.46	18	547	299
novel_980	3:110013980-110042321	149	-25.21	149	-25.21	21	831	595
gga-miR-6641-3p	16:2733248-2734870	150	-25.07	150	-25.07	21	335	202
novel_514	4:5093850-5096145	150	-29.31	150	-29.31	22	550	423
novel_853	21:3122687-3126565	142	-21.63	142	-21.63	21	308	41
gga-miR-103-2-5p	15:6681541-6682012	311	-34.4	161	-22.56	23	366	30 124
gga-miR-1689-5p	4:5093850-5096145	167	-22.94	167	-22.94	22	550	288
novel_417	4:65097900-65102412	154	-23.46	154	-23.46	22	894	697
novel_723	18:4180338-4182886	144	-20.17	144	-20.17	22	699	563
novel_299	14:6667631-6690566	163	-20.9	163	-20.9	23	3864	1095
novel_211	3:110013980-110042321	164	-20.72	164	-20.72	19	831	392
novel_677	16:2733248-2734870	153	-24.69	153	-24.69	25	335	95
novel_345	18:4180338-4182886	305	-46.26	154	-25.42	24	699	634 339
gga-miR-1754-5p	14:13807324-13807958	148	-21.94	148	-21.94	20	547	385
novel_508	10:12132977-12161781	309	-35.69	164	-21.83	24	1939	718 886
novel_767	Z:7450000-7475226	155	-21.67	155	-21.67	21	773	444
novel_971	18:4180338-4182886	615	-96.97	159	-28.72	22	699	576 670 486 649
novel_251	3:104232958-104234270	155	-20.1	155	-20.1	22	413	282
gga-miR-33-5p	1:193881978-193887114	158	-21.93	158	-21.93	20	453	294
novel_640	6:36302501-36309401	157	-21.42	157	-21.42	22	520	172
novel_808	30:538735-539347	152	-20.77	152	-20.77	20	225	80
gga-miR-1659	14:13807324-13807958	147	-20.1	147	-20.1	23	547	19
gga-miR-193b-3p	6:16997989-17005138	148	-21.17	148	-21.17	24	584	202
novel_671	30:538735-539347	191	-37.36	191	-37.36	22	225	201
novel_471	14:6667631-6690566	311	-38.61	160	-21.05	23	3864	3652 2360
novel_803	3:110013980-110042321	168	-33.18	168	-33.18	24	831	728
gga-miR-1622	10:12132977-12161781	167	-23.21	167	-23.21	21	1939	366
gga-miR-1608	Z:9501366-9504669	142	-22.24	142	-22.24	22	444	194
gga-miR-15b-5p	14:6667631-6690566	157	-23.95	157	-23.95	22	3864	2612
novel_49	14:13807324-13807958	162	-24.3	162	-24.3	24	547	518
novel_756	21:6349960-6361958	156	-25.62	156	-25.62	22	597	56
gga-miR-6580-5p	1:56932512-56949904	155	-20.31	155	-20.31	22	1301	851
gga-miR-7452-3p	1:193881978-193887114	155	-25.62	155	-25.62	26	453	310
gga-miR-221-3p	3:110013980-110042321	160	-21.74	160	-21.74	23	831	211
novel_363	18:4180338-4182886	159	-22.63	159	-22.63	22	699	634
novel_811	14:6667631-6690566	286	-39.39	143	-20.5	23	3864	125 3749
gga-miR-365-1-5p	14:13807324-13807958	156	-26.59	156	-26.59	23	547	2
novel_970	Z:9501366-9504669	154	-24.12	154	-24.12	21	444	216
gga-miR-196-2-3p	10:12132977-12161781	164	-21.37	164	-21.37	22	1939	1451
novel_927	Z:9501366-9504669	156	-27.11	156	-27.11	25	444	93
gga-miR-18a-3p	20:1404151-1406715	145	-20.57	145	-20.57	22	422	66
novel_934	1:193881978-193887114	164	-24.55	164	-24.55	23	453	48
novel_971	30:538735-539347	157	-25.79	157	-25.79	22	225	177
novel_392	14:13807324-13807958	149	-22.72	149	-22.72	24	547	285
gga-miR-1674	20:1404151-1406715	149	-21.72	149	-21.72	25	422	28
gga-miR-6600-3p	3:107147300-107151497	147	-22.88	147	-22.88	23	522	331
novel_356	14:6667631-6690566	153	-22.26	153	-22.26	22	3864	2557
novel_939	14:6667631-6690566	485	-75.34	171	-26.47	22	3864	1293 2744 3552
novel_377	14:6667631-6690566	309	-38.61	160	-21.05	22	3864	3653 2359
novel_229	7:8060373-8061624	143	-21.84	143	-21.84	23	272	98
novel_891	2:8746306-8750639	152	-20.91	152	-20.91	23	390	147
novel_980	14:13807324-13807958	145	-20.71	145	-20.71	21	547	103
gga-miR-1550-5p	2:64684729-64686182	169	-26.1	169	-26.1	21	282	38
gga-miR-6664-3p	10:8044919-8049376	174	-35.54	174	-35.54	22	583	264
gga-miR-1769-5p	18:4180338-4182886	160	-21.64	160	-21.64	22	699	647
novel_182	1:79079526-79092394	160	-21.9	160	-21.9	22	406	168
novel_320	15:6681541-6682012	147	-24.85	147	-24.85	22	366	166
novel_506	18:4180338-4182886	168	-31.39	168	-31.39	23	699	286
gga-miR-7466-3p	3:104232958-104234270	146	-20.52	146	-20.52	23	413	234
gga-miR-1771	14:6667631-6690566	157	-21.39	157	-21.39	21	3864	3718
novel_91	5:17348967-17351158	147	-22.03	147	-22.03	22	526	111
novel_685	1:193881978-193887114	145	-21.54	145	-21.54	24	453	192
novel_625	1:15272024-15339851	159	-24	159	-24	23	642	205
novel_364	14:13807324-13807958	295	-44.81	151	-24.32	22	547	146 280
novel_419	1:193881978-193887114	146	-20.05	146	-20.05	22	453	129
novel_619	1:56932512-56949904	305	-35.1	156	-20.62	22	1301	1038 573
gga-miR-6569-5p	5:50719738-50729260	150	-20.21	150	-20.21	23	336	246
novel_634	1:15272024-15339851	297	-41.55	149	-22	23	642	503 588
novel_474	2:17975751-17985248	151	-21.51	151	-21.51	20	919	887
novel_66	2:17975751-17985248	158	-22.21	158	-22.21	24	919	470
novel_290	10:12132977-12161781	161	-22.59	161	-22.59	23	1939	76
novel_361	4:89908603-89918509	167	-20.24	167	-20.24	23	556	481
gga-miR-6558-5p	2:17975751-17985248	309	-35.64	161	-20.87	24	919	523 442
novel_369	2:17975751-17985248	162	-26.33	162	-26.33	23	919	43
novel_558	10:8044919-8049376	163	-24.74	163	-24.74	24	583	338
novel_263	3:110013980-110042321	156	-22.95	156	-22.95	21	831	123
gga-miR-6601-3p	14:6667631-6690566	451	-66.66	154	-26.92	21	3864	2825 138 3526
novel_655	2:64684729-64686182	159	-20.16	159	-20.16	22	282	15
novel_288	18:4180338-4182886	154	-20.74	154	-20.74	21	699	493
novel_264	18:4180338-4182886	153	-24.93	153	-24.93	21	699	682
gga-miR-6584-5p	16:2733248-2734870	156	-20.32	156	-20.32	23	335	60
gga-miR-1769-5p	4:5093850-5096145	150	-21.23	150	-21.23	22	550	527
novel_910	3:104232958-104234270	150	-22.09	150	-22.09	22	413	385
novel_227	4:5093850-5096145	164	-23.5	164	-23.5	24	550	311
gga-miR-7469-3p	3:107147300-107151497	175	-20.95	175	-20.95	23	522	258
gga-miR-1801	4:89908603-89918509	158	-22.78	158	-22.78	22	556	228
novel_120	1:56932512-56949904	162	-21.16	162	-21.16	22	1301	1187
novel_806	6:36302501-36309401	140	-20.47	140	-20.47	22	520	73
novel_700	10:18596448-18598792	171	-20.58	171	-20.58	25	471	402
gga-miR-6607-5p	14:13807324-13807958	156	-28.06	156	-28.06	24	547	491
novel_564	10:18596448-18598792	147	-22.18	147	-22.18	22	471	437
novel_724	2:881177-884854	158	-20.68	158	-20.68	24	405	259
novel_856	18:4180338-4182886	155	-20.31	155	-20.31	22	699	673
novel_765	21:3691802-3694190	167	-20.29	167	-20.29	21	560	188
novel_352	16:2733248-2734870	157	-25.91	157	-25.91	23	335	176
gga-miR-1562-5p	6:16997989-17005138	163	-22.09	163	-22.09	22	584	183
gga-miR-6584-5p	14:6667631-6690566	319	-43.17	167	-26.85	23	3864	2315 1583
novel_107	3:110013980-110042321	158	-20.24	158	-20.24	22	831	266
novel_524	21:3691802-3694190	149	-20.84	149	-20.84	23	560	136
gga-miR-6551-3p	14:13807324-13807958	154	-23.57	154	-23.57	22	547	171
novel_767	5:17348967-17351158	316	-41.95	159	-21.82	21	526	237 276
gga-miR-449c-5p	6:30450791-30452406	141	-20.02	141	-20.02	24	906	572
novel_718	3:105140077-105142087	302	-45.23	162	-34.14	23	383	133 1
gga-miR-18a-3p	1:15272024-15339851	291	-38.08	150	-21.4	22	642	83 237
gga-miR-1465	10:12132977-12161781	169	-28.08	169	-28.08	21	1939	1046
novel_522	19:8563661-8565823	155	-23.24	155	-23.24	22	569	411
gga-miR-1748	1:56932512-56949904	321	-42.56	168	-26.82	22	1301	1036 572
gga-miR-6592-3p	10:12132977-12161781	150	-24.15	150	-24.15	21	1939	1409
gga-miR-7442-5p	1:61812485-61813589	150	-21.61	150	-21.61	22	268	138
novel_605	10:12132977-12161781	159	-21.27	159	-21.27	24	1939	5
gga-miR-6646-3p	30:538735-539347	152	-21.89	152	-21.89	22	225	133
novel_363	21:3691802-3694190	162	-21.69	162	-21.69	22	560	248
gga-miR-1687-3p	Z:9501366-9504669	149	-20.19	149	-20.19	21	444	256
novel_129	16:2733248-2734870	329	-70.55	169	-36.29	19	335	301 285
gga-miR-3594-3p	14:6667631-6690566	154	-25.51	154	-25.51	22	3864	705
novel_596	3:110013980-110042321	148	-21.78	148	-21.78	24	831	122
novel_715	18:4180338-4182886	159	-30.93	159	-30.93	22	699	495
novel_436	14:6667631-6690566	150	-23.02	150	-23.02	20	3864	3703
gga-miR-6542-5p	Z:7450000-7475226	155	-21.5	155	-21.5	22	773	558
gga-miR-7455-3p	7:15032338-15040086	145	-20.5	145	-20.5	23	280	66
novel_643	18:4180338-4182886	163	-34.72	163	-34.72	21	699	371
gga-miR-460b-5p	6:16997989-17005138	156	-20.06	156	-20.06	22	584	124
novel_975	18:4180338-4182886	167	-29.17	167	-29.17	24	699	144
novel_654	14:6667631-6690566	165	-27.73	165	-27.73	23	3864	3810
novel_122	1:12744003-12750283	150	-22.57	150	-22.57	22	393	273
gga-miR-6646-3p	Z:9501366-9504669	154	-22.49	154	-22.49	22	444	197
novel_117	4:12532765-12540210	156	-22.29	156	-22.29	23	285	125
novel_161	14:6667631-6690566	146	-26.72	146	-26.72	22	3864	2986
gga-miR-147	Z:9501366-9504669	160	-21.2	160	-21.2	20	444	81
gga-miR-6654-3p	14:6667631-6690566	465	-63.83	161	-21.48	23	3864	801 1222 2009
novel_463	14:6667631-6690566	467	-66.05	166	-22.91	22	3864	3054 1349 582
gga-miR-216c	10:18596448-18598792	153	-20.84	153	-20.84	22	471	252
gga-miR-1762	2:120915124-120916022	155	-23.78	155	-23.78	24	898	67
novel_959	4:89908603-89918509	156	-23.56	156	-23.56	23	556	470
novel_790	6:16997989-17005138	146	-21.67	146	-21.67	22	584	66
gga-miR-1564-3p	21:3691802-3694190	156	-22.95	156	-22.95	22	560	54
novel_91	5:50719738-50729260	158	-26.64	158	-26.64	22	336	196
novel_798	4:89908603-89918509	151	-23.84	151	-23.84	22	556	526
novel_660	5:17348967-17351158	142	-20.31	142	-20.31	25	526	405
gga-miR-1640	2:17975751-17985248	143	-20.99	143	-20.99	24	919	435
novel_833	21:3691802-3694190	152	-21.78	152	-21.78	21	560	112
gga-miR-1710	1:72888896-72939506	157	-21.99	157	-21.99	22	791	85
novel_497	1:79079526-79092394	147	-22.4	147	-22.4	21	406	225
novel_729	4:65097900-65102412	159	-22.04	159	-22.04	23	894	335
gga-miR-1564-3p	2:120915124-120916022	156	-20.7	156	-20.7	22	898	92
novel_974	4:12532765-12540210	145	-25.07	145	-25.07	19	285	224
novel_320	1:56932512-56949904	140	-20.5	140	-20.5	22	1301	1157
novel_394	Z:7450000-7475226	151	-22.48	151	-22.48	23	773	334
gga-miR-1562-5p	1:72888896-72939506	150	-22.33	150	-22.33	22	791	674
novel_23	20:1404151-1406715	170	-26.87	170	-26.87	23	422	285
novel_693	Z:7450000-7475226	148	-20.82	148	-20.82	22	773	309
novel_832	1:61812485-61813589	160	-29.19	160	-29.19	22	268	199
gga-miR-30c-2-3p	Z:36839947-36841327	162	-20.83	162	-20.83	21	360	57
novel_91	2:17975751-17985248	298	-45.85	150	-23.76	22	919	231 271
gga-miR-1564-3p	18:4180338-4182886	145	-20.01	145	-20.01	22	699	541
novel_715	10:18596448-18598792	151	-23.29	151	-23.29	22	471	147
gga-miR-6597-3p	7:15032338-15040086	157	-26.57	157	-26.57	24	280	63
gga-miR-1551-5p	21:3122687-3126565	165	-24.77	165	-24.77	23	308	226
novel_619	2:64703915-64711715	158	-24.69	158	-24.69	22	577	76
gga-miR-6596-3p	6:30450791-30452406	143	-21.17	143	-21.17	22	906	773
novel_212	2:17975751-17985248	146	-21.37	146	-21.37	22	919	225
novel_620	30:538735-539347	157	-27.59	157	-27.59	21	225	117
novel_922	10:12132977-12161781	157	-24.54	157	-24.54	23	1939	726
novel_841	14:13807324-13807958	155	-21.53	155	-21.53	23	547	147
gga-miR-6587-3p	Z:36839947-36841327	153	-20.57	153	-20.57	23	360	36
novel_731	2:17975751-17985248	316	-45.46	169	-25.97	24	919	262 208
novel_474	14:6667631-6690566	307	-39.16	165	-22.19	20	3864	156 1466
novel_804	3:110013980-110042321	304	-47.82	153	-25.88	22	831	520 166
novel_631	4:89908603-89918509	453	-55.39	155	-20.72	22	556	198 219 113
novel_216	6:30450791-30452406	312	-44.21	160	-22.69	24	906	520 439
novel_189	3:104232958-104234270	160	-21.3	160	-21.3	23	413	376
novel_769	4:89908603-89918509	149	-21.5	149	-21.5	22	556	348
gga-miR-6575-5p	7:8060373-8061624	159	-24.21	159	-24.21	22	272	6
gga-miR-6615-3p	19:8563661-8565823	152	-24.75	152	-24.75	22	569	44
novel_898	7:8060373-8061624	161	-25.25	161	-25.25	23	272	5
novel_440	10:8044919-8049376	159	-20.32	159	-20.32	24	583	365
novel_431	4:65097900-65102412	162	-27.19	162	-27.19	22	894	474
novel_676	4:89913504-89918509	159	-23.04	159	-23.04	24	390	62
novel_252	1:15272024-15339851	144	-21.62	144	-21.62	23	642	203
novel_252	2:64703915-64711715	157	-21.48	157	-21.48	23	577	261
gga-miR-1649-5p	10:12132977-12161781	291	-42.62	151	-22.22	20	1939	1136 438
novel_30	10:18596448-18598792	158	-24.19	158	-24.19	21	471	206
novel_142	2:64684729-64686182	152	-21.14	152	-21.14	20	282	245
gga-miR-1466	14:13807324-13807958	164	-32.22	164	-32.22	24	547	248
gga-miR-1696	10:18596448-18598792	160	-26.36	160	-26.36	24	471	141
novel_11	20:1404151-1406715	162	-22.63	162	-22.63	24	422	284
novel_66	1:79079526-79092394	157	-21.01	157	-21.01	24	406	57
novel_789	14:6667631-6690566	440	-55.13	151	-21.54	22	3864	3034 3569 1164
gga-miR-6674-3p	14:6667631-6690566	171	-27.23	171	-27.23	21	3864	3384
gga-miR-1650	6:36302501-36309401	144	-20.3	144	-20.3	24	520	483
gga-miR-6660-3p	2:17975751-17985248	155	-21.38	155	-21.38	24	919	108
novel_332	1:193881978-193887114	160	-25.32	160	-25.32	23	453	283
novel_873	10:8044919-8049376	162	-21.93	162	-21.93	23	583	365
novel_911	Z:7450000-7475226	149	-29.2	149	-29.2	21	773	445
gga-miR-1585	2:17975751-17985248	143	-23.75	143	-23.75	24	919	347
novel_92	14:13807324-13807958	158	-27.06	158	-27.06	22	547	244
gga-miR-1668-5p	16:2733248-2734870	153	-22.21	153	-22.21	22	335	15
gga-let-7g-5p	1:15272024-15339851	146	-20.91	146	-20.91	21	642	123
novel_857	10:8044919-8049376	165	-24.74	165	-24.74	25	583	337
novel_528	2:64703915-64711715	152	-22.85	152	-22.85	24	577	468
novel_152	4:5093850-5096145	288	-42	145	-21.52	23	550	183 274
gga-miR-1574-3p	3:110013980-110042321	155	-21.67	155	-21.67	22	831	724
novel_43	4:5093850-5096145	160	-23.52	160	-23.52	23	550	464
gga-miR-133c-3p	18:4180338-4182886	305	-48.23	154	-25.32	22	699	122 502
novel_842	1:107983050-107986514	165	-20.97	165	-20.97	24	423	277
novel_514	1:56932512-56949904	154	-20.71	154	-20.71	22	1301	162
gga-miR-6542-5p	5:17348967-17351158	148	-21.77	148	-21.77	22	526	122
gga-miR-1626-3p	1:56932512-56949904	161	-28.33	161	-28.33	22	1301	1217
novel_380	4:12532765-12540210	154	-21.62	154	-21.62	24	285	259
gga-miR-1602	3:110013980-110042321	338	-60.03	177	-33.79	22	831	522 165
novel_827	14:6667631-6690566	149	-22.26	149	-22.26	21	3864	1613
gga-miR-1689-5p	2:8746306-8750639	151	-20.91	151	-20.91	22	390	148
novel_106	7:30699299-30701196	162	-24.36	162	-24.36	22	244	220
gga-miR-6655-5p	2:881177-884854	158	-20.68	158	-20.68	23	405	260
gga-miR-1661	10:18596448-18598792	169	-20.58	169	-20.58	24	471	403
gga-miR-1783	4:12532765-12540210	149	-22.12	149	-22.12	23	285	180
novel_798	4:89913504-89918509	151	-23.84	151	-23.84	22	390	360
novel_652	14:6667631-6690566	148	-21.2	148	-21.2	25	3864	755
novel_839	15:6681541-6682012	154	-25.65	154	-25.65	22	366	324
novel_296	1:72888896-72939506	173	-26.51	173	-26.51	22	791	96
novel_170	10:8044919-8049376	151	-20.26	151	-20.26	23	583	365
novel_106	21:3691802-3694190	153	-27.57	153	-27.57	22	560	82
novel_443	2:120915124-120916022	155	-21.25	155	-21.25	18	898	309
novel_662	14:13807324-13807958	146	-23.32	146	-23.32	23	547	142
novel_799	14:6667631-6690566	463	-69.14	166	-24.87	22	3864	3673 2164 2282
novel_419	2:120915124-120916022	162	-26.58	162	-26.58	22	898	493
novel_391	5:17348967-17351158	149	-22.86	149	-22.86	21	526	110
gga-miR-1580	15:6681541-6682012	297	-35.49	154	-24.67	21	366	31 129
gga-miR-2954	Z:7450000-7475226	166	-20.61	166	-20.61	22	773	264
novel_646	2:881177-884854	159	-22.39	159	-22.39	22	405	354
novel_470	1:61812485-61813589	163	-23.9	163	-23.9	22	268	203
novel_516	KZ626826.1:7149-7526	156	-20.69	156	-20.69	24	285	172
novel_781	1:15272024-15339851	167	-28.89	167	-28.89	25	642	280
novel_911	6:36302501-36309401	297	-42.65	151	-21.96	21	520	348 389
novel_699	2:17975751-17985248	309	-41.28	157	-24.82	22	919	74 673
gga-miR-6597-3p	3:107147300-107151497	148	-23.58	148	-23.58	24	522	360
gga-miR-1649-3p	14:13807324-13807958	165	-30.8	165	-30.8	20	547	289
gga-miR-7460-5p	10:12132977-12161781	150	-23.48	150	-23.48	25	1939	344
gga-miR-1774	10:18596448-18598792	151	-21.91	151	-21.91	21	471	148
novel_725	4:89908603-89918509	293	-34.93	153	-20.12	22	556	315 492
gga-miR-6564-5p	2:64684729-64686182	149	-21.93	149	-21.93	21	282	20
novel_320	18:4180338-4182886	148	-25.53	148	-25.53	22	699	464
novel_768	4:89908603-89918509	157	-23.29	157	-23.29	21	556	105
novel_320	21:6349960-6361958	147	-22	147	-22	22	597	456
novel_975	4:65097900-65102412	147	-25	147	-25	24	894	572
gga-miR-138-5p	2:64703915-64711715	163	-25.22	163	-25.22	17	577	378
novel_687	14:6667631-6690566	288	-36.79	146	-20.54	22	3864	3463 3141
novel_364	18:4180338-4182886	162	-25.92	162	-25.92	22	699	344
gga-miR-1712-5p	18:4180338-4182886	141	-22.27	141	-22.27	22	699	381
gga-miR-7451-3p	14:6667631-6690566	159	-21.68	159	-21.68	22	3864	1794
novel_501	3:107147300-107151497	153	-20.93	153	-20.93	22	522	234
gga-miR-6550-3p	18:4180338-4182886	149	-22.57	149	-22.57	22	699	171
novel_767	3:104232958-104234270	158	-22.18	158	-22.18	21	413	329
novel_856	19:8563661-8565823	151	-22.77	151	-22.77	22	569	35
novel_502	4:89913504-89918509	165	-22.4	165	-22.4	23	390	205
gga-miR-214	21:3691802-3694190	160	-21.09	160	-21.09	21	560	249
gga-miR-1727	1:72888896-72939506	156	-20.59	156	-20.59	23	791	696
novel_682	14:13807324-13807958	156	-22.61	156	-22.61	21	547	90
novel_436	2:17975751-17985248	143	-23.15	143	-23.15	20	919	281
novel_6	3:110013980-110042321	170	-21.25	170	-21.25	23	831	63
novel_946	Z:7450000-7475226	155	-21.67	155	-21.67	22	773	443
gga-miR-1687-5p	21:3691802-3694190	161	-22.19	161	-22.19	21	560	331
novel_214	1:193881978-193887114	160	-24.21	160	-24.21	20	453	73
novel_486	18:4180338-4182886	158	-26.23	158	-26.23	22	699	239
novel_718	5:17348967-17351158	150	-28.85	150	-28.85	23	526	30
novel_91	4:5093850-5096145	153	-23.01	153	-23.01	22	550	193
gga-miR-6649-3p	14:13807324-13807958	150	-21.03	150	-21.03	22	547	191
novel_901	30:538735-539347	158	-27.79	158	-27.79	25	225	125
novel_403	14:13807324-13807958	148	-20.67	148	-20.67	22	547	11
novel_767	2:17975751-17985248	168	-23.18	168	-23.18	21	919	661
gga-miR-1649-5p	14:6667631-6690566	153	-24.44	153	-24.44	20	3864	1683
novel_164	14:6667631-6690566	168	-25.55	168	-25.55	23	3864	658
gga-miR-1668-5p	18:4180338-4182886	145	-22.06	145	-22.06	22	699	563
novel_701	14:6667631-6690566	147	-20.16	147	-20.16	19	3864	3650
gga-miR-1674	19:8563661-8565823	169	-25.59	169	-25.59	25	569	205
gga-miR-15c-5p	14:6667631-6690566	157	-22.02	157	-22.02	22	3864	2612
gga-miR-6584-5p	4:5093850-5096145	155	-24.01	155	-24.01	23	550	388
novel_200	14:13807324-13807958	173	-29.46	173	-29.46	19	547	298
gga-miR-1656	18:4180338-4182886	152	-24.07	152	-24.07	22	699	384
novel_229	14:6667631-6690566	290	-39.42	147	-21.48	23	3864	3136 2875
novel_598	1:56932512-56949904	156	-21.05	156	-21.05	18	1301	602
novel_870	7:8060373-8061624	151	-21.28	151	-21.28	18	272	53
gga-miR-6620-5p	14:6667631-6690566	156	-24.22	156	-24.22	23	3864	2457
gga-miR-1764-3p	1:72888896-72939506	158	-24.03	158	-24.03	21	791	703
novel_546	14:6667631-6690566	297	-39.3	156	-24.57	19	3864	3708 3017
novel_910	18:4180338-4182886	140	-21.04	140	-21.04	22	699	445
novel_332	30:538735-539347	157	-20.17	157	-20.17	23	225	203
novel_769	10:12132977-12161781	157	-20.64	157	-20.64	22	1939	118
novel_646	18:4180338-4182886	298	-42.21	150	-21.45	22	699	381 674
novel_642	1:56932512-56949904	150	-26.86	150	-26.86	21	1301	174
novel_888	10:12132977-12161781	159	-25.34	159	-25.34	25	1939	1446
novel_296	14:6667631-6690566	161	-26.26	161	-26.26	22	3864	3340
novel_789	2:120915124-120916022	163	-21.69	163	-21.69	22	898	650
gga-miR-6587-3p	3:110013980-110042321	147	-23.57	147	-23.57	23	831	248
gga-miR-146c-5p	20:1404151-1406715	174	-26.89	174	-26.89	23	422	285
novel_684	16:2733248-2734870	145	-21.49	145	-21.49	24	335	110
gga-miR-1604	6:36302501-36309401	154	-25.03	154	-25.03	23	520	376
novel_65	10:8044919-8049376	173	-29.24	173	-29.24	25	583	63
novel_970	2:120915124-120916022	145	-20.56	145	-20.56	21	898	70
novel_470	2:17975751-17985248	149	-21.85	149	-21.85	22	919	395
gga-miR-1772-5p	21:3691802-3694190	147	-20.49	147	-20.49	22	560	40
novel_797	4:65097900-65102412	158	-23.3	158	-23.3	21	894	348
novel_359	2:120915124-120916022	164	-21.71	164	-21.71	22	898	637
novel_165	14:6667631-6690566	166	-27.73	166	-27.73	24	3864	3809
gga-miR-205a	2:120915124-120916022	145	-20.17	145	-20.17	22	898	15
novel_963	Z:7450000-7475226	163	-21.69	163	-21.69	23	773	82
novel_498	4:89908603-89918509	156	-23.04	156	-23.04	22	556	230
gga-miR-1684a-5p	2:8746306-8750639	172	-26.15	172	-26.15	22	390	154
gga-miR-222b-5p	14:6667631-6690566	297	-40.81	157	-24.79	26	3864	2053 1
novel_854	4:5093850-5096145	154	-22.87	154	-22.87	22	550	314
novel_548	15:6681541-6682012	160	-21.39	160	-21.39	20	366	143
novel_408	10:12132977-12161781	160	-22.3	160	-22.3	21	1939	1639
novel_947	5:17348967-17351158	312	-42.35	159	-22.33	24	526	137 49
novel_95	15:6681541-6682012	162	-25.99	162	-25.99	22	366	33
novel_470	14:6667631-6690566	156	-23.82	156	-23.82	22	3864	3831
novel_906	1:56932512-56949904	157	-21.65	157	-21.65	21	1301	1187
novel_927	1:56932512-56949904	152	-23.91	152	-23.91	25	1301	470
gga-miR-1574-3p	14:13807324-13807958	154	-22.78	154	-22.78	22	547	368
gga-miR-18a-3p	10:18596448-18598792	150	-20.87	150	-20.87	22	471	149
gga-miR-1689-5p	2:120915124-120916022	158	-23.81	158	-23.81	22	898	88
novel_461	2:17975751-17985248	160	-21.79	160	-21.79	22	919	253
gga-miR-6637-3p	16:2733248-2734870	155	-28.71	155	-28.71	23	335	14
gga-miR-1457	6:36302501-36309401	144	-20.39	144	-20.39	22	520	398
novel_945	21:3691802-3694190	172	-20.29	172	-20.29	22	560	187
novel_962	14:6667631-6690566	155	-24.62	155	-24.62	24	3864	2517
gga-miR-204	2:17975751-17985248	152	-20.19	152	-20.19	22	919	233
novel_152	2:17975751-17985248	313	-44.93	168	-28	23	919	803 245
novel_750	10:12132977-12161781	153	-21.53	153	-21.53	22	1939	1637
novel_535	20:1404151-1406715	170	-24.39	170	-24.39	23	422	285
novel_227	21:3122687-3126565	162	-21.9	162	-21.9	24	308	227
novel_843	10:8044919-8049376	149	-20.05	149	-20.05	21	583	326
novel_867	3:110013980-110042321	170	-23.4	170	-23.4	23	831	273
gga-miR-1763	1:15272024-15339851	149	-30.09	149	-30.09	23	642	527
gga-miR-7452-5p	14:6667631-6690566	151	-28.15	151	-28.15	21	3864	716
gga-miR-1775-3p	19:8563661-8565823	163	-20.65	163	-20.65	22	569	230
novel_952	Z:9501366-9504669	145	-29.59	145	-29.59	21	444	219
novel_594	Z:9501366-9504669	154	-22.94	154	-22.94	20	444	217
gga-miR-6696-3p	2:17975751-17985248	156	-24.49	156	-24.49	23	919	390
novel_220	3:110013980-110042321	159	-21.47	159	-21.47	23	831	740
novel_387	14:13807324-13807958	168	-29.66	168	-29.66	18	547	299
novel_684	18:4180338-4182886	159	-22.04	159	-22.04	24	699	346
gga-miR-125b-3p	6:30450791-30452406	155	-23.79	155	-23.79	22	906	775
novel_279	1:79079526-79092394	161	-20.83	161	-20.83	22	406	183
novel_69	30:538735-539347	140	-27.09	140	-27.09	23	225	132
gga-miR-1792	1:79079526-79092394	141	-21	141	-21	23	406	250
novel_905	4:89908603-89918509	156	-21.31	156	-21.31	21	556	104
novel_538	KZ626826.1:7149-7526	149	-23.73	149	-23.73	22	285	171
gga-miR-1554	3:110013980-110042321	148	-20.91	148	-20.91	21	831	547
novel_977	Z:7450000-7475226	167	-22.44	167	-22.44	20	773	219
gga-miR-6549-5p	1:79079526-79092394	155	-20.5	155	-20.5	23	406	214
novel_631	14:13807324-13807958	306	-46.62	159	-27	22	547	39 515
gga-miR-3528	3:110013980-110042321	146	-23.06	146	-23.06	22	831	121
novel_921	14:6667631-6690566	150	-25.95	150	-25.95	22	3864	2518
gga-miR-6555-5p	1:15272024-15339851	318	-37.63	173	-25.77	22	642	427 485
gga-miR-1745	5:17348967-17351158	147	-23.14	147	-23.14	22	526	33
novel_571	7:30699299-30701196	167	-28.97	167	-28.97	23	244	144
novel_812	14:6667631-6690566	148	-22.43	148	-22.43	23	3864	3710
novel_198	3:110013980-110042321	155	-21.67	155	-21.67	24	831	722
gga-miR-6677-3p	14:6667631-6690566	153	-21	153	-21	21	3864	3794
novel_267	1:56932512-56949904	171	-26.71	171	-26.71	24	1301	680
novel_874	1:56932512-56949904	148	-20.23	148	-20.23	24	1301	1186
gga-miR-21-5p	4:89913504-89918509	166	-25.49	166	-25.49	22	390	103
novel_281	19:8563661-8565823	165	-25.15	165	-25.15	24	569	438
novel_756	10:18596448-18598792	155	-24.1	155	-24.1	22	471	191
gga-miR-1649-5p	14:13807324-13807958	310	-58.28	166	-33.16	20	547	148 278
gga-miR-2130	14:6667631-6690566	155	-27.01	155	-27.01	23	3864	3641
gga-miR-3531-3p	5:17348967-17351158	159	-21.01	159	-21.01	23	526	11
gga-miR-6660-3p	4:89908603-89918509	157	-24.54	157	-24.54	24	556	467
gga-miR-1762	2:64703915-64711715	145	-20.09	145	-20.09	24	577	269
novel_502	14:6667631-6690566	169	-23.06	169	-23.06	23	3864	206
novel_220	6:30450791-30452406	172	-23.81	172	-23.81	23	906	609
gga-miR-2129	21:3691802-3694190	154	-22.82	154	-22.82	23	560	245
novel_426	1:79079526-79092394	161	-21.47	161	-21.47	23	406	182
novel_436	7:8060373-8061624	157	-21.13	157	-21.13	20	272	228
novel_103	1:193881978-193887114	164	-24.55	164	-24.55	22	453	49
novel_278	16:2733248-2734870	151	-23.77	151	-23.77	22	335	15
novel_777	2:64703915-64711715	150	-20.15	150	-20.15	22	577	433
novel_816	14:13807324-13807958	159	-29.03	159	-29.03	20	547	53
novel_152	14:13807324-13807958	330	-61.45	177	-35.23	23	547	145 279
gga-miR-6577-5p	2:64684729-64686182	169	-27.53	169	-27.53	23	282	169
novel_196	18:4180338-4182886	159	-20.42	159	-20.42	22	699	18
novel_498	4:89913504-89918509	156	-23.04	156	-23.04	22	390	64
gga-miR-1732	4:89908603-89918509	159	-22.43	159	-22.43	21	556	9
novel_666	2:881177-884854	150	-22.18	150	-22.18	22	405	182
novel_332	3:110013980-110042321	296	-44.99	150	-26.61	23	831	510 12
gga-miR-6548-3p	4:65097900-65102412	157	-20.6	157	-20.6	22	894	72
novel_449	16:2733248-2734870	154	-20.57	154	-20.57	22	335	127
novel_444	18:4180338-4182886	155	-24.29	155	-24.29	21	699	454
novel_924	14:13807324-13807958	153	-25.28	153	-25.28	22	547	376
novel_106	10:12132977-12161781	145	-20.22	145	-20.22	22	1939	719
novel_686	16:2733248-2734870	150	-24.98	150	-24.98	22	335	190
gga-miR-6569-5p	20:1404151-1406715	148	-24.06	148	-24.06	23	422	63
novel_856	4:89908603-89918509	157	-25.84	157	-25.84	22	556	113
novel_857	2:64703915-64711715	172	-20.96	172	-20.96	25	577	209
gga-miR-6677-5p	21:3691802-3694190	164	-20.38	164	-20.38	25	560	495
gga-miR-6679-5p	14:6667631-6690566	150	-23.3	150	-23.3	24	3864	1106
gga-miR-6615-5p	14:6667631-6690566	142	-21.87	142	-21.87	24	3864	3746
gga-miR-16-5p	1:72888896-72939506	165	-21.69	165	-21.69	22	791	455
gga-miR-6661-5p	14:6667631-6690566	153	-22.71	153	-22.71	22	3864	714
novel_595	2:17975751-17985248	152	-22.18	152	-22.18	22	919	248
gga-miR-15b-5p	1:72888896-72939506	157	-20.93	157	-20.93	22	791	451
novel_163	3:104232958-104234270	160	-21.93	160	-21.93	22	413	174
novel_17	1:15272024-15339851	151	-23.5	151	-23.5	22	642	127
gga-miR-1636	4:5093850-5096145	149	-23.61	149	-23.61	20	550	368
novel_234	1:56932512-56949904	159	-31.88	159	-31.88	22	1301	1206
gga-miR-3594-3p	30:538735-539347	157	-20.17	157	-20.17	22	225	204
gga-miR-3532-5p	3:110013980-110042321	169	-27.76	169	-27.76	22	831	317
gga-miR-6587-3p	16:2733248-2734870	173	-30.99	173	-30.99	23	335	61
novel_942	14:6667631-6690566	146	-20.2	146	-20.2	22	3864	3749
gga-miR-458a-5p	21:3691802-3694190	169	-21.98	169	-21.98	21	560	372
novel_149	1:61812485-61813589	157	-20.06	157	-20.06	22	268	79
gga-miR-1651-3p	5:17348967-17351158	312	-43.79	162	-22.74	22	526	210 413
novel_657	10:12132977-12161781	163	-28.93	163	-28.93	23	1939	498
novel_78	18:4180338-4182886	295	-40.97	155	-22.32	23	699	401 543
novel_382	3:104232958-104234270	154	-26.5	154	-26.5	22	413	105
gga-miR-6699-5p	2:120915124-120916022	147	-20.74	147	-20.74	22	898	139
novel_731	6:36302501-36309401	144	-20.3	144	-20.3	24	520	483
gga-miR-1765	16:2733248-2734870	149	-27.09	149	-27.09	20	335	194
novel_815	14:6667631-6690566	141	-20.49	141	-20.49	22	3864	3747
novel_296	2:120915124-120916022	145	-20.56	145	-20.56	22	898	69
novel_573	10:18596448-18598792	150	-23.01	150	-23.01	21	471	192
novel_352	2:64703915-64711715	152	-25	152	-25	23	577	493
novel_260	2:17975751-17985248	314	-43.1	162	-26.64	23	919	73 672
novel_756	10:12132977-12161781	152	-21.85	152	-21.85	22	1939	1450
novel_720	Z:9501366-9504669	158	-26.17	158	-26.17	22	444	254
novel_280	18:4180338-4182886	298	-37.57	152	-22.73	22	699	14 428
novel_389	14:13807324-13807958	155	-28.74	155	-28.74	22	547	169
novel_749	1:12744003-12750283	155	-22.4	155	-22.4	23	393	246
novel_451	16:2733248-2734870	148	-24.3	148	-24.3	18	335	239
gga-miR-199-3p	10:8044919-8049376	150	-20.69	150	-20.69	20	583	537
novel_476	4:5093850-5096145	152	-20.49	152	-20.49	20	550	344
gga-miR-6550-3p	KZ626826.1:7149-7526	156	-24.14	156	-24.14	22	285	251
novel_302	1:61812485-61813589	150	-22.26	150	-22.26	22	268	141
novel_833	16:2733248-2734870	156	-22.95	156	-22.95	21	335	80
gga-let-7k-5p	1:15272024-15339851	151	-23.5	151	-23.5	22	642	127
novel_613	21:3691802-3694190	163	-26.05	163	-26.05	24	560	5
gga-miR-7471-3p	Z:9501366-9504669	145	-28.96	145	-28.96	20	444	218
gga-miR-6666-3p	14:6667631-6690566	168	-28.5	168	-28.5	22	3864	875
novel_152	2:120915124-120916022	160	-24.15	160	-24.15	23	898	72
novel_864	21:6349960-6361958	154	-26.8	154	-26.8	20	597	546
novel_704	4:89908603-89918509	300	-34.82	153	-21.68	21	556	130 3
novel_278	18:4180338-4182886	159	-28.95	159	-28.95	22	699	562
novel_49	14:6667631-6690566	158	-20.54	158	-20.54	24	3864	1474
novel_223	KZ626826.1:7149-7526	161	-29.46	161	-29.46	22	285	167
gga-miR-6708-5p	1:193881978-193887114	156	-20.49	156	-20.49	23	453	383
novel_946	5:17348967-17351158	316	-43.97	159	-23.84	22	526	236 275
novel_934	14:6667631-6690566	322	-49.54	170	-28.73	23	3864	750 2271
novel_964	6:36302501-36309401	153	-20.5	153	-20.5	23	520	137
novel_703	3:107147300-107151497	149	-23.16	149	-23.16	24	522	77
gga-miR-1466	14:6667631-6690566	158	-27.12	158	-27.12	24	3864	3805
gga-miR-6619-5p	14:6667631-6690566	162	-21.34	162	-21.34	22	3864	3668
gga-miR-1464	2:64684729-64686182	159	-23.97	159	-23.97	24	282	14
gga-miR-211	2:17975751-17985248	152	-20.19	152	-20.19	22	919	233
gga-miR-7472-5p	14:13807324-13807958	161	-21.05	161	-21.05	22	547	100
novel_767	21:3691802-3694190	164	-24.65	164	-24.65	21	560	66
novel_361	4:89913504-89918509	167	-20.24	167	-20.24	23	390	315
novel_152	KZ626826.1:7149-7526	145	-21.25	145	-21.25	23	285	226
novel_76	14:6667631-6690566	167	-27.38	167	-27.38	22	3864	1881
novel_174	2:64684729-64686182	159	-20.7	159	-20.7	23	282	16
gga-miR-6629-5p	1:193881978-193887114	153	-20.13	153	-20.13	26	453	262
novel_860	14:6667631-6690566	161	-20.5	161	-20.5	22	3864	2633
novel_662	18:4180338-4182886	304	-45.89	153	-25.42	23	699	635 340
gga-miR-1456-3p	18:4180338-4182886	146	-21.25	146	-21.25	21	699	206
novel_657	Z:9501366-9504669	151	-21.52	151	-21.52	23	444	94
gga-miR-183	10:8044919-8049376	157	-20.4	157	-20.4	23	583	258
novel_310	3:107147300-107151497	156	-20.82	156	-20.82	23	522	328
novel_722	14:13807324-13807958	164	-22.93	164	-22.93	22	547	382
novel_819	4:12532765-12540210	161	-24.24	161	-24.24	24	285	124
gga-miR-1574-3p	14:6667631-6690566	466	-62.97	164	-23.95	22	3864	1699 2039 3336
novel_702	4:12532765-12540210	154	-21.62	154	-21.62	25	285	258
novel_144	1:56932512-56949904	171	-25.76	171	-25.76	22	1301	682
gga-miR-6573-5p	14:6667631-6690566	167	-31.31	167	-31.31	22	3864	3664
novel_749	10:18596448-18598792	151	-22.82	151	-22.82	23	471	136
novel_940	16:2733248-2734870	294	-40.69	154	-21.35	21	335	282 299
gga-miR-6648-3p	4:89908603-89918509	156	-23.04	156	-23.04	21	556	231
novel_551	14:13807324-13807958	146	-24.32	146	-24.32	22	547	189
novel_971	21:6349960-6361958	146	-21.23	146	-21.23	22	597	468
novel_618	2:881177-884854	328	-48.27	166	-26.62	22	405	97 114
gga-miR-133a-3p	18:4180338-4182886	305	-48.4	154	-25.87	22	699	122 502
gga-miR-1756a	1:79079526-79092394	143	-20.85	143	-20.85	22	406	198
novel_709	16:2733248-2734870	157	-25.29	157	-25.29	23	335	174
novel_828	Z:7450000-7475226	144	-20.87	144	-20.87	23	773	636
novel_515	2:64703915-64711715	154	-25.71	154	-25.71	19	577	88
gga-miR-1453	18:4180338-4182886	145	-24.09	145	-24.09	23	699	623
novel_800	1:193881978-193887114	160	-28.42	160	-28.42	23	453	335
novel_467	30:538735-539347	159	-26.86	159	-26.86	22	225	129
novel_969	14:6667631-6690566	155	-26.28	155	-26.28	21	3864	3812
gga-miR-6570-5p	6:16997989-17005138	157	-22.39	157	-22.39	24	584	326
gga-miR-3537	2:64703915-64711715	169	-23.33	169	-23.33	23	577	491
novel_351	3:110013980-110042321	140	-23.47	140	-23.47	21	831	269
gga-miR-1801	4:89913504-89918509	158	-22.78	158	-22.78	22	390	62
gga-miR-7455-5p	KZ626826.1:7149-7526	145	-25.42	145	-25.42	23	285	95
novel_520	3:110013980-110042321	175	-33.19	175	-33.19	22	831	196
gga-miR-7443-3p	2:120915124-120916022	155	-26.25	155	-26.25	23	898	491
gga-miR-6597-3p	5:50719738-50729260	147	-20.77	147	-20.77	24	336	193
novel_787	10:18596448-18598792	146	-21.43	146	-21.43	22	471	136
gga-miR-1564-3p	4:89913504-89918509	150	-20.19	150	-20.19	22	390	74
novel_99	4:89908603-89918509	147	-22.43	147	-22.43	22	556	256
gga-miR-1671	2:17975751-17985248	155	-23.49	155	-23.49	23	919	37
novel_446	10:18596448-18598792	164	-24.32	164	-24.32	23	471	202
novel_735	18:4180338-4182886	151	-21.1	151	-21.1	20	699	438
gga-miR-7443-5p	10:12132977-12161781	150	-26.36	150	-26.36	23	1939	1631
novel_839	Z:7450000-7475226	168	-37	168	-37	22	773	453
gga-miR-6607-5p	6:16997989-17005138	160	-21.53	160	-21.53	24	584	1
gga-miR-1583	3:104232958-104234270	154	-20.22	154	-20.22	20	413	382
novel_452	2:8746306-8750639	153	-26.03	153	-26.03	23	390	260
novel_473	3:110013980-110042321	148	-23.42	148	-23.42	22	831	308
novel_625	14:6667631-6690566	164	-26.48	164	-26.48	23	3864	2462
gga-miR-6578-5p	2:17975751-17985248	161	-22.16	161	-22.16	21	919	251
novel_382	1:56932512-56949904	299	-40.12	154	-20.56	22	1301	846 400
gga-miR-1703-5p	3:110013980-110042321	162	-24.05	162	-24.05	23	831	267
gga-miR-6677-5p	Z:7450000-7475226	159	-21.59	159	-21.59	25	773	43
novel_278	Z:7450000-7475226	160	-33.86	160	-33.86	22	773	587
gga-miR-6555-5p	14:6667631-6690566	323	-41.17	178	-27.61	22	3864	2861 1182
gga-miR-6570-3p	6:30450791-30452406	161	-21.67	161	-21.67	22	906	341
novel_345	14:13807324-13807958	146	-25.1	146	-25.1	24	547	141
gga-miR-1673	14:13807324-13807958	144	-25.43	144	-25.43	22	547	489
gga-miR-3594-3p	Z:7450000-7475226	298	-45.28	155	-28.07	22	773	686 175
gga-miR-6669-3p	4:5093850-5096145	152	-24.73	152	-24.73	22	550	272
novel_220	10:12132977-12161781	159	-21.27	159	-21.27	23	1939	6
novel_911	30:538735-539347	145	-23.4	145	-23.4	21	225	40
novel_170	6:30450791-30452406	159	-21.11	159	-21.11	23	906	576
gga-miR-1771	Z:7450000-7475226	173	-20.69	173	-20.69	21	773	353
novel_780	19:8563661-8565823	152	-24.75	152	-24.75	22	569	44
novel_217	4:89908603-89918509	156	-23.04	156	-23.04	21	556	231
novel_911	20:1404151-1406715	297	-48.39	150	-26.54	21	422	80 241
novel_704	10:12132977-12161781	148	-24.23	148	-24.23	21	1939	1787
gga-miR-7456-3p	14:6667631-6690566	150	-23.36	150	-23.36	22	3864	2463
novel_419	6:30450791-30452406	143	-20.26	143	-20.26	22	906	8
novel_91	Z:7450000-7475226	151	-24.34	151	-24.34	22	773	437
novel_684	3:105140077-105142087	140	-20.01	140	-20.01	24	383	152
gga-miR-7463-3p	5:50719738-50729260	164	-20.86	164	-20.86	22	336	238
gga-miR-1710	10:8044919-8049376	163	-26.07	163	-26.07	22	583	400
gga-miR-1453	30:538735-539347	158	-21.96	158	-21.96	23	225	149
novel_891	4:5093850-5096145	167	-24.89	167	-24.89	23	550	287
gga-miR-1802	Z:9501366-9504669	159	-23.3	159	-23.3	22	444	176
gga-miR-1653	2:120915124-120916022	148	-23.46	148	-23.46	22	898	67
novel_710	10:8044919-8049376	153	-20.13	153	-20.13	23	583	424
novel_885	14:13807324-13807958	140	-20.1	140	-20.1	21	547	148
gga-miR-196-2-3p	4:5093850-5096145	140	-21.73	140	-21.73	22	550	258
novel_252	14:6667631-6690566	150	-24.23	150	-24.23	23	3864	2462
gga-miR-6560-5p	2:120915124-120916022	155	-20.37	155	-20.37	23	898	524
novel_558	2:64703915-64711715	172	-20.96	172	-20.96	24	577	210
novel_946	3:104232958-104234270	158	-23.91	158	-23.91	22	413	328
novel_631	KZ626826.1:7149-7526	159	-20.26	159	-20.26	22	285	44
gga-miR-181a-5p	1:56932512-56949904	168	-21.37	168	-21.37	23	1301	459
gga-miR-1551-3p	3:107147300-107151497	153	-20.93	153	-20.93	22	522	234
gga-miR-29b-2-5p	3:107147300-107151497	162	-20.49	162	-20.49	25	522	1
novel_891	2:120915124-120916022	158	-27.33	158	-27.33	23	898	87
gga-miR-456-3p	3:104232958-104234270	160	-24.85	160	-24.85	22	413	43
novel_195	KZ626826.1:7149-7526	149	-20.9	149	-20.9	23	285	33
gga-miR-2130	10:12132977-12161781	147	-22.3	147	-22.3	23	1939	1918
novel_343	16:2733248-2734870	303	-53.12	155	-27.86	22	335	55 166
novel_229	3:107147300-107151497	152	-22.14	152	-22.14	23	522	279
gga-miR-1662	2:64703915-64711715	159	-20.5	159	-20.5	22	577	196
novel_718	1:56932512-56949904	152	-20.95	152	-20.95	23	1301	368
novel_891	5:17348967-17351158	162	-29.28	162	-29.28	23	526	306
novel_634	7:30699299-30701196	173	-29.95	173	-29.95	23	244	167
gga-miR-6612-5p	14:6667631-6690566	155	-20.33	155	-20.33	22	3864	2990
novel_710	14:6667631-6690566	472	-67.32	166	-24.13	23	3864	3053 1348 581
novel_264	5:17348967-17351158	303	-40.18	159	-25.01	21	526	451 349
novel_642	16:2733248-2734870	155	-29.64	155	-29.64	21	335	244
gga-miR-6698-3p	6:16997989-17005138	167	-21.49	167	-21.49	23	584	493
novel_739	14:6667631-6690566	142	-21.33	142	-21.33	22	3864	3829
novel_292	14:6667631-6690566	143	-21.21	143	-21.21	23	3864	2053
novel_301	10:8044919-8049376	153	-20.27	153	-20.27	25	583	366
novel_343	14:13807324-13807958	163	-26.46	163	-26.46	22	547	123
gga-miR-6705-5p	18:4180338-4182886	168	-25.26	168	-25.26	21	699	377
gga-miR-6550-3p	16:2733248-2734870	154	-24.46	154	-24.46	22	335	190
novel_814	1:56932512-56949904	172	-31.73	172	-31.73	24	1301	1228
novel_907	4:89908603-89918509	158	-23.04	158	-23.04	23	556	229
gga-miR-146a-5p	20:1404151-1406715	170	-26.87	170	-26.87	22	422	286
novel_484	21:3691802-3694190	162	-21.69	162	-21.69	23	560	247
novel_769	4:89913504-89918509	149	-21.5	149	-21.5	22	390	182
gga-miR-365-1-5p	1:79079526-79092394	150	-21.27	150	-21.27	23	406	207
novel_99	4:89913504-89918509	147	-22.43	147	-22.43	22	390	90
novel_583	3:110013980-110042321	147	-21.03	147	-21.03	22	831	123
novel_31	2:120915124-120916022	145	-20.01	145	-20.01	22	898	232
novel_771	30:538735-539347	154	-24.87	154	-24.87	23	225	128
gga-miR-302b-5p	15:6681541-6682012	156	-20.87	156	-20.87	23	366	333
novel_621	4:5093850-5096145	154	-24	154	-24	21	550	289
gga-miR-1608	1:56932512-56949904	156	-20.21	156	-20.21	22	1301	1058
gga-miR-6685-3p	Z:9501366-9504669	145	-21.52	145	-21.52	21	444	95
novel_560	14:13807324-13807958	154	-22.83	154	-22.83	21	547	123
novel_618	7:15032338-15040086	163	-22.14	163	-22.14	22	280	74
novel_736	4:5093850-5096145	155	-20.77	155	-20.77	21	550	337
gga-miR-6563-3p	18:4180338-4182886	162	-30.24	162	-30.24	24	699	135
gga-miR-1724	7:15032338-15040086	149	-24.54	149	-24.54	23	280	158
novel_684	2:120915124-120916022	171	-26.75	171	-26.75	24	898	170
gga-miR-6645-5p	1:56932512-56949904	144	-21.01	144	-21.01	22	1301	207
gga-miR-3530-3p	14:6667631-6690566	165	-24.97	165	-24.97	21	3864	1882
gga-miR-6677-5p	1:56932512-56949904	155	-22.4	155	-22.4	25	1301	443
novel_971	KZ626826.1:7149-7526	151	-23.47	151	-23.47	22	285	1
gga-miR-6543-3p	2:881177-884854	294	-38.86	149	-22.56	18	405	385 111
gga-miR-1459	3:110013980-110042321	161	-23.73	161	-23.73	28	831	494
gga-miR-6546-5p	16:2733248-2734870	147	-21.35	147	-21.35	22	335	198
gga-miR-6611-5p	14:13807324-13807958	148	-23.24	148	-23.24	22	547	95
novel_354	14:6667631-6690566	147	-21.39	147	-21.39	22	3864	770
novel_531	4:5093850-5096145	149	-24.64	149	-24.64	21	550	367
gga-miR-1564-3p	4:89908603-89918509	150	-20.19	150	-20.19	22	556	240
novel_176	4:12532765-12540210	153	-21.62	153	-21.62	23	285	260
novel_900	30:538735-539347	145	-21.3	145	-21.3	22	225	147
gga-miR-7452-5p	14:13807324-13807958	147	-24.09	147	-24.09	21	547	51
gga-miR-1649-5p	2:120915124-120916022	154	-20.47	154	-20.47	20	898	76
novel_184	4:5093850-5096145	154	-24.65	154	-24.65	23	550	313
novel_540	14:6667631-6690566	736	-76.96	152	-23.73	22	3864	571 3057 1412 2836 304
gga-miR-1747-3p	10:12132977-12161781	302	-39.12	154	-22.54	22	1939	1430 905
novel_192	10:18596448-18598792	164	-24.32	164	-24.32	22	471	203
novel_433	14:13807324-13807958	152	-27.91	152	-27.91	18	547	255
novel_976	3:107147300-107151497	161	-21.66	161	-21.66	25	522	328
gga-miR-1618-5p	1:56932512-56949904	155	-25.03	155	-25.03	22	1301	882
novel_853	4:65097900-65102412	152	-20.64	152	-20.64	21	894	729
gga-miR-200a-3p	7:8060373-8061624	162	-20.44	162	-20.44	22	272	26
novel_724	14:6667631-6690566	148	-23.11	148	-23.11	24	3864	1657
gga-miR-1785	21:3122687-3126565	168	-29.38	168	-29.38	22	308	181
novel_631	4:89913504-89918509	306	-41.05	155	-20.72	22	390	32 53
gga-miR-6596-3p	2:64703915-64711715	148	-21.65	148	-21.65	22	577	466
gga-miR-1611	1:193881978-193887114	308	-48.67	160	-24.36	22	453	146 303
gga-miR-1689-5p	KZ626826.1:7149-7526	165	-25.8	165	-25.8	22	285	193
gga-miR-6605-5p	4:5093850-5096145	162	-21.8	162	-21.8	23	550	181
novel_784	14:13807324-13807958	156	-23.7	156	-23.7	22	547	9
novel_264	14:6667631-6690566	733	-96.32	150	-22.41	21	3864	1182 2861 2432 3389 3575
gga-miR-302a	10:12132977-12161781	162	-21.31	162	-21.31	22	1939	117
novel_776	10:12132977-12161781	160	-22.03	160	-22.03	23	1939	1682
novel_853	10:8044919-8049376	145	-20.32	145	-20.32	21	583	255
gga-miR-3594-3p	1:193881978-193887114	160	-25.32	160	-25.32	22	453	284
gga-miR-6628-3p	Z:7450000-7475226	159	-22.56	159	-22.56	21	773	317
novel_233	1:72888896-72939506	164	-20.6	164	-20.6	21	791	456
novel_960	16:2733248-2734870	150	-25.46	150	-25.46	22	335	232
novel_628	KZ626826.1:7149-7526	155	-24.55	155	-24.55	22	285	226
gga-miR-1563	4:65097900-65102412	159	-20.89	159	-20.89	24	894	128
gga-miR-146b-5p	20:1404151-1406715	162	-22.63	162	-22.63	22	422	286
gga-miR-6609-3p	Z:9501366-9504669	152	-30.77	152	-30.77	23	444	184
novel_970	1:72888896-72939506	173	-26.51	173	-26.51	21	791	97
novel_301	3:107147300-107151497	148	-24.11	148	-24.11	25	522	325
gga-miR-1757	20:1404151-1406715	159	-20.23	159	-20.23	21	422	266
novel_182	5:17348967-17351158	477	-63.77	163	-23.95	22	526	104 130 438
gga-miR-365-2-5p	18:4180338-4182886	142	-20.33	142	-20.33	23	699	405
gga-miR-7460-5p	5:50719738-50729260	147	-25.22	147	-25.22	25	336	96
gga-miR-3532-3p	10:8044919-8049376	156	-21.85	156	-21.85	22	583	246
novel_641	14:13807324-13807958	316	-59.73	160	-30.1	21	547	134 454
novel_2	1:193881978-193887114	152	-21.6	152	-21.6	24	453	416
novel_364	2:17975751-17985248	308	-45	158	-27.75	22	919	802 247
novel_374	6:30450791-30452406	159	-21.2	159	-21.2	25	906	577
gga-miR-6549-3p	10:12132977-12161781	169	-27.56	169	-27.56	23	1939	1627
gga-miR-15a	1:72888896-72939506	165	-20.93	165	-20.93	21	791	452
gga-miR-365-2-5p	14:13807324-13807958	161	-28.56	161	-28.56	23	547	1
novel_878	2:881177-884854	167	-22.38	167	-22.38	22	405	6
gga-miR-6583-5p	14:13807324-13807958	294	-40.12	148	-21.46	18	547	371 424
gga-miR-1553-3p	14:6667631-6690566	159	-28.52	159	-28.52	22	3864	2516
gga-miR-6651-5p	18:4180338-4182886	157	-26.28	157	-26.28	21	699	368
novel_286	Z:7450000-7475226	163	-21.69	163	-21.69	24	773	81
novel_704	Z:7450000-7475226	283	-40.07	143	-20.38	21	773	446 569
novel_971	14:6667631-6690566	308	-45.74	158	-23.48	22	3864	1396 3735
gga-miR-6655-5p	14:6667631-6690566	146	-23.11	146	-23.11	23	3864	1658
novel_146	18:4180338-4182886	151	-22.56	151	-22.56	22	699	384
novel_182	2:881177-884854	160	-21.15	160	-21.15	22	405	379
gga-miR-92-3p	14:6667631-6690566	168	-24.74	168	-24.74	21	3864	660
novel_199	3:104232958-104234270	160	-24.85	160	-24.85	23	413	42
novel_666	3:110013980-110042321	156	-23.06	156	-23.06	22	831	422
novel_764	10:12132977-12161781	153	-24.77	153	-24.77	22	1939	1787
gga-miR-181b-5p	2:64703915-64711715	172	-20.96	172	-20.96	22	577	212
novel_389	10:8044919-8049376	154	-21.83	154	-21.83	22	583	475
gga-miR-6619-5p	1:56932512-56949904	307	-42.46	154	-22.84	22	1301	1254 8
novel_719	1:56932512-56949904	158	-23.39	158	-23.39	22	1301	47
novel_684	5:17348967-17351158	452	-69.1	153	-27.45	24	526	319 186 407
gga-miR-460b-3p	14:13807324-13807958	145	-22.41	145	-22.41	23	547	85
novel_655	14:6667631-6690566	297	-33.91	151	-22.44	22	3864	3279 1878
gga-miR-6601-3p	18:4180338-4182886	158	-24.53	158	-24.53	21	699	42
gga-miR-1649-5p	16:2733248-2734870	294	-51.58	152	-28.01	20	335	137 217
novel_920	4:5093850-5096145	155	-29.28	155	-29.28	23	550	514
novel_596	4:5093850-5096145	155	-23	155	-23	24	550	500
novel_766	14:6667631-6690566	149	-22.37	149	-22.37	23	3864	1087
novel_427	2:120915124-120916022	148	-23.46	148	-23.46	22	898	67
novel_97	2:120915124-120916022	149	-23.46	149	-23.46	23	898	67
novel_855	4:5093850-5096145	154	-30.06	154	-30.06	22	550	512
gga-miR-6577-3p	4:65097900-65102412	151	-24.25	151	-24.25	21	894	657
gga-miR-1680-5p	7:30699299-30701196	150	-21.2	150	-21.2	22	244	164
novel_621	14:6667631-6690566	152	-23.15	152	-23.15	21	3864	1096
gga-miR-6650-5p	4:5093850-5096145	150	-23.47	150	-23.47	24	550	314
novel_87	4:89908603-89918509	153	-20.5	153	-20.5	24	556	101
novel_402	6:30450791-30452406	153	-22.26	153	-22.26	21	906	776
novel_332	Z:7450000-7475226	303	-50.31	160	-31.59	23	773	685 174
gga-miR-365-2-5p	1:79079526-79092394	154	-20.93	154	-20.93	23	406	207
novel_364	10:12132977-12161781	302	-43.03	157	-23.33	22	1939	434 1134
gga-miR-6575-5p	15:6681541-6682012	147	-23.22	147	-23.22	22	366	68
gga-miR-1687-3p	14:13807324-13807958	151	-20.16	151	-20.16	21	547	115
gga-miR-6549-5p	15:6681541-6682012	443	-52.65	152	-20.11	23	366	17 2 89
gga-miR-1625-3p	2:17975751-17985248	143	-20.07	143	-20.07	22	919	801
novel_621	10:8044919-8049376	152	-25.04	152	-25.04	21	583	375
novel_103	14:6667631-6690566	322	-49.54	170	-28.73	22	3864	751 2271
novel_152	18:4180338-4182886	158	-26.45	158	-26.45	23	699	342
novel_918	10:18596448-18598792	169	-20.58	169	-20.58	24	471	403
novel_354	2:881177-884854	148	-22.42	148	-22.42	22	405	233
novel_939	KZ626826.1:7149-7526	145	-21.87	145	-21.87	22	285	43
gga-miR-1618-5p	3:110013980-110042321	150	-25.08	150	-25.08	22	831	502
novel_946	2:17975751-17985248	168	-23.66	168	-23.66	22	919	660
gga-miR-1306-5p	2:8746306-8750639	158	-25.46	158	-25.46	25	390	259
novel_364	21:3691802-3694190	152	-21.91	152	-21.91	22	560	1
novel_209	10:12132977-12161781	155	-22.72	155	-22.72	18	1939	1919
gga-miR-455-3p	3:104232958-104234270	165	-23.24	165	-23.24	22	413	175
novel_482	18:4180338-4182886	155	-24.41	155	-24.41	21	699	454
novel_680	KZ626826.1:7149-7526	153	-30.17	153	-30.17	22	285	91
novel_220	3:107147300-107151497	140	-24.01	140	-24.01	23	522	118
gga-miR-1710	1:15272024-15339851	309	-33.02	160	-21.59	22	642	424 486
gga-miR-1774	1:56932512-56949904	145	-21.41	145	-21.41	21	1301	1275
novel_287	16:2733248-2734870	152	-25.72	152	-25.72	22	335	177
novel_221	5:17348967-17351158	150	-27.45	150	-27.45	23	526	122
gga-miR-6609-3p	14:13807324-13807958	165	-24.54	165	-24.54	23	547	178
novel_607	14:6667631-6690566	159	-21.37	159	-21.37	23	3864	658
gga-miR-6543-3p	19:8563661-8565823	148	-21.3	148	-21.3	18	569	425
gga-miR-1689-5p	5:17348967-17351158	162	-29.28	162	-29.28	22	526	307
novel_522	18:4180338-4182886	141	-22.74	141	-22.74	22	699	163
gga-miR-1807	7:15032338-15040086	314	-40.45	163	-22.26	22	280	92 34
gga-miR-1595-5p	14:6667631-6690566	296	-40	150	-20.25	22	3864	3699 336
novel_660	19:8563661-8565823	142	-20.4	142	-20.4	25	569	479
gga-miR-1723	30:538735-539347	160	-25.56	160	-25.56	23	225	85
novel_152	16:2733248-2734870	307	-54.28	154	-28.23	23	335	134 217
gga-miR-6598-5p	14:6667631-6690566	146	-21.47	146	-21.47	21	3864	2431
novel_699	14:6667631-6690566	621	-71.93	163	-27.35	22	3864	546 3356 288 1800
gga-miR-1646	10:18596448-18598792	152	-21.08	152	-21.08	23	471	149
novel_81	16:2733248-2734870	155	-27.46	155	-27.46	22	335	258
gga-miR-1696	10:8044919-8049376	160	-25.12	160	-25.12	24	583	395
novel_529	1:56932512-56949904	166	-25.35	166	-25.35	23	1301	158
novel_522	7:8060373-8061624	157	-21.54	157	-21.54	22	272	226
gga-miR-142-5p	6:16997989-17005138	163	-21.51	163	-21.51	22	584	323
gga-miR-6606-5p	14:13807324-13807958	157	-27.67	157	-27.67	20	547	367
novel_804	30:538735-539347	156	-29.21	156	-29.21	22	225	61
novel_701	1:79079526-79092394	149	-20.26	149	-20.26	19	406	198
novel_982	10:12132977-12161781	315	-36.55	172	-22.46	22	1939	477 448
novel_898	15:6681541-6682012	149	-23.84	149	-23.84	23	366	67
novel_736	14:6667631-6690566	299	-33.75	153	-21.08	21	3864	2154 1263
novel_911	KZ626826.1:7149-7526	171	-37.01	171	-37.01	21	285	158
gga-miR-1649-5p	4:5093850-5096145	286	-37.84	145	-20.29	20	550	186 276
novel_562	14:6667631-6690566	322	-49.41	170	-28.6	21	3864	752 2272
novel_275	30:538735-539347	157	-28.97	157	-28.97	23	225	115
novel_926	4:89913504-89918509	159	-27.98	159	-27.98	23	390	179
novel_340	KZ626826.1:7149-7526	140	-24.3	140	-24.3	20	285	126
gga-miR-1769-5p	30:538735-539347	151	-25.92	151	-25.92	22	225	175
novel_179	2:64684729-64686182	154	-20.52	154	-20.52	23	282	84
gga-miR-4732-5p	14:13807324-13807958	306	-44.27	153	-23.2	21	547	369 423
novel_592	Z:9501366-9504669	160	-25.05	160	-25.05	18	444	227
novel_764	5:17348967-17351158	155	-22.27	155	-22.27	22	526	276
gga-miR-6586-5p	6:36302501-36309401	154	-21.33	154	-21.33	23	520	173
gga-miR-1553-5p	19:8563661-8565823	151	-20.14	151	-20.14	24	569	230
novel_22	3:110013980-110042321	160	-21.74	160	-21.74	23	831	211
gga-miR-1680-5p	2:64703915-64711715	141	-21.61	141	-21.61	22	577	298
gga-miR-1560-3p	10:18596448-18598792	164	-24.2	164	-24.2	22	471	254
novel_436	19:8563661-8565823	149	-20	149	-20	20	569	413
gga-miR-1756b	2:17975751-17985248	157	-21.84	157	-21.84	23	919	225
gga-miR-6556-5p	3:104232958-104234270	153	-22.22	153	-22.22	22	413	132
novel_729	5:17348967-17351158	326	-47.05	166	-23.84	23	526	358 145
novel_815	10:18596448-18598792	155	-21.14	155	-21.14	22	471	268
novel_735	19:8563661-8565823	295	-44.97	148	-27.49	20	569	65 502
novel_917	Z:7450000-7475226	159	-23.29	159	-23.29	23	773	272
novel_787	1:12744003-12750283	150	-21.01	150	-21.01	22	393	246
novel_411	Z:7450000-7475226	314	-38.69	158	-22.71	22	773	407 207
novel_62	1:79079526-79092394	155	-20.12	155	-20.12	21	406	318
novel_815	7:15032338-15040086	160	-22	160	-22	22	280	135
novel_949	16:2733248-2734870	145	-25.44	145	-25.44	18	335	1
novel_691	KZ626826.1:7149-7526	162	-30.12	162	-30.12	23	285	166
gga-miR-1796	10:8044919-8049376	154	-25.7	154	-25.7	21	583	317
novel_634	10:8044919-8049376	173	-27.57	173	-27.57	23	583	65
novel_202	Z:9501366-9504669	141	-20.99	141	-20.99	23	444	113
gga-miR-222b-5p	14:13807324-13807958	146	-22.27	146	-22.27	26	547	241
gga-miR-1656	2:64703915-64711715	147	-22.97	147	-22.97	22	577	488
gga-miR-125b-3p	10:18596448-18598792	157	-20.79	157	-20.79	22	471	326
gga-miR-6690-5p	4:65097900-65102412	158	-21.86	158	-21.86	23	894	482
novel_91	3:107147300-107151497	158	-20.69	158	-20.69	22	522	365
gga-miR-365-1-5p	18:4180338-4182886	149	-23.2	149	-23.2	23	699	405
novel_888	21:6349960-6361958	153	-26.22	153	-26.22	25	597	57
novel_209	1:79079526-79092394	147	-20.03	147	-20.03	18	406	197
gga-miR-1626-3p	1:193881978-193887114	143	-20.21	143	-20.21	22	453	352
gga-miR-1453	21:6349960-6361958	145	-22.45	145	-22.45	23	597	545
gga-miR-7442-3p	10:12132977-12161781	156	-25.27	156	-25.27	21	1939	197
novel_355	10:12132977-12161781	164	-26.69	164	-26.69	22	1939	1628
novel_70	19:8563661-8565823	159	-22.76	159	-22.76	23	569	293
novel_493	14:6667631-6690566	156	-23.35	156	-23.35	21	3864	2440
novel_439	3:104232958-104234270	140	-21.74	140	-21.74	22	413	380
gga-miR-365-2-5p	14:6667631-6690566	143	-20.47	143	-20.47	23	3864	3511
novel_473	5:17348967-17351158	140	-20.77	140	-20.77	22	526	170
gga-miR-6660-3p	4:89913504-89918509	157	-24.54	157	-24.54	24	390	301
novel_197	Z:9501366-9504669	162	-22.42	162	-22.42	23	444	137
gga-miR-1610	14:6667631-6690566	147	-21.66	147	-21.66	21	3864	2663
novel_971	3:110013980-110042321	160	-21.68	160	-21.68	22	831	800
gga-miR-205a	6:30450791-30452406	451	-50.61	159	-21.29	22	906	422 102 144
