# Supplementary material for: Analysis of circRNA expression in chicken HD11 cells in response to avian pathogenic E.coli
Source: Front Vet Sci. 2022 Sep 15;9:1005899. doi: 10.3389/fvets.2022.1005899 (PMC9521048; doi:10.3389/fvets.2022.1005899)
Supplement: Supplementary file 6 [file Table_6.XLSX]

## Sheet: Sheet1
Table 6 The circRNA-miRNA-mRNA interaction network
circRNA ID	miRNA ID	mRNA ID
10:18596448-18598792	gga-miR-125b-3p	CAMK2A
10:18596448-18598792	gga-miR-125b-3p	CACNA1C
10:18596448-18598792	gga-miR-125b-3p	TANC2
10:18596448-18598792	gga-miR-125b-3p	FZD3
10:18596448-18598792	gga-miR-125b-3p	DHRS3
10:18596448-18598792	gga-miR-125b-3p	TOP2A
10:18596448-18598792	gga-miR-125b-3p	PCYOX1
10:18596448-18598792	gga-miR-125b-3p	PXDN
4:12532765-12540210	gga-miR-146c-3p	DCLK2
4:12532765-12540210	gga-miR-146c-3p	PAK1
4:12532765-12540210	gga-miR-146c-3p	PPFIBP1
4:12532765-12540210	gga-miR-146c-3p	WDR3
4:12532765-12540210	gga-miR-146c-3p	LARP1
4:12532765-12540210	gga-miR-146c-3p	ST3GAL3
4:12532765-12540210	gga-miR-146c-3p	TBL1XR1
4:12532765-12540210	gga-miR-146c-3p	YWHAB
4:12532765-12540210	gga-miR-146c-3p	CHST3
4:12532765-12540210	gga-miR-146c-3p	GCSH
4:12532765-12540210	gga-miR-146c-3p	ST3GAL4
4:12532765-12540210	gga-miR-146c-3p	ORMDL3
4:12532765-12540210	gga-miR-146c-3p	QKI
4:12532765-12540210	gga-miR-146c-3p	S1PR2
4:12532765-12540210	gga-miR-146c-3p	IQGAP2
4:12532765-12540210	gga-miR-146c-3p	BRD2
4:12532765-12540210	gga-miR-146c-3p	CRKL
4:12532765-12540210	gga-miR-146c-3p	PLEKHG5
4:12532765-12540210	gga-miR-146c-3p	HM13
4:12532765-12540210	gga-miR-146c-3p	LDLRAP1
4:12532765-12540210	gga-miR-146c-3p	ETV6
4:12532765-12540210	gga-miR-146c-3p	SEC14L5
4:12532765-12540210	gga-miR-146c-3p	PRRX2
4:12532765-12540210	gga-miR-146c-3p	LBH
4:12532765-12540210	gga-miR-146c-3p	RAPH1
4:12532765-12540210	gga-miR-146c-3p	PIGU
14:13807324-13807958	gga-miR-1574-3p	RASGEF1A
14:13807324-13807958	gga-miR-1574-3p	BCL2L13
14:13807324-13807958	gga-miR-1574-3p	KLF12
14:13807324-13807958	gga-miR-1574-3p	ZHX1
10:12132977-12161781	gga-miR-1649-5p	MYH9
14:13807324-13807958	gga-miR-1649-5p	MYH9
14:6667631-6690566	gga-miR-1649-5p	MYH9
16:2733248-2734870	gga-miR-1649-5p	MYH9
18:4180338-4182886	gga-miR-1649-5p	MYH9
2:120915124-120916022	gga-miR-1649-5p	MYH9
2:17975751-17985248	gga-miR-1649-5p	MYH9
3:107147300-107151497	gga-miR-1649-5p	MYH9
4:5093850-5096145	gga-miR-1649-5p	MYH9
10:12132977-12161781	gga-miR-1649-5p	EPS8
14:13807324-13807958	gga-miR-1649-5p	EPS8
14:6667631-6690566	gga-miR-1649-5p	EPS8
16:2733248-2734870	gga-miR-1649-5p	EPS8
18:4180338-4182886	gga-miR-1649-5p	EPS8
2:120915124-120916022	gga-miR-1649-5p	EPS8
2:17975751-17985248	gga-miR-1649-5p	EPS8
3:107147300-107151497	gga-miR-1649-5p	EPS8
4:5093850-5096145	gga-miR-1649-5p	EPS8
2:120915124-120916022	gga-miR-1653	FHL3
2:120915124-120916022	gga-miR-1653	TPM2
2:120915124-120916022	gga-miR-1653	FZD3
2:120915124-120916022	gga-miR-1653	LASP1
2:120915124-120916022	gga-miR-1653	GAS2L1
2:120915124-120916022	gga-miR-1653	CLIP2
2:120915124-120916022	gga-miR-1653	APCDD1
2:120915124-120916022	gga-miR-1653	FKBP10
2:120915124-120916022	gga-miR-1653	SOGA1
2:120915124-120916022	gga-miR-1653	PDGFRB
2:120915124-120916022	gga-miR-1653	NRP2
2:120915124-120916022	gga-miR-1653	SDC1
2:120915124-120916022	gga-miR-1653	FSTL1
10:18596448-18598792	gga-miR-1696	TNC
10:18596448-18598792	gga-miR-1696	MYO5C
10:18596448-18598792	gga-miR-1696	ORMDL3
10:18596448-18598792	gga-miR-1696	DHCR7
10:18596448-18598792	gga-miR-1696	NDUFB2
10:18596448-18598792	gga-miR-1696	ANTXR1
10:18596448-18598792	gga-miR-1696	HECW2
10:18596448-18598792	gga-miR-1696	CBY1
10:18596448-18598792	gga-miR-1696	B4GALT2
10:18596448-18598792	gga-miR-1696	OAZ2
10:18596448-18598792	gga-miR-1696	AAGAB
10:8044919-8049376	gga-miR-1696	TNC
10:8044919-8049376	gga-miR-1696	MYO5C
10:8044919-8049376	gga-miR-1696	ORMDL3
10:8044919-8049376	gga-miR-1696	DHCR7
10:8044919-8049376	gga-miR-1696	NDUFB2
10:8044919-8049376	gga-miR-1696	ANTXR1
10:8044919-8049376	gga-miR-1696	HECW2
10:8044919-8049376	gga-miR-1696	CBY1
10:8044919-8049376	gga-miR-1696	B4GALT2
10:8044919-8049376	gga-miR-1696	OAZ2
10:8044919-8049376	gga-miR-1696	AAGAB
4:12532765-12540210	gga-miR-1747-5p	ZFYVE19
10:12132977-12161781	gga-miR-1754-5p	PEMT
10:12132977-12161781	gga-miR-1754-5p	TMEM37
10:12132977-12161781	gga-miR-1754-5p	HRH3
10:12132977-12161781	gga-miR-1754-5p	GID4
14:13807324-13807958	gga-miR-1754-5p	PEMT
14:13807324-13807958	gga-miR-1754-5p	TMEM37
14:13807324-13807958	gga-miR-1754-5p	HRH3
14:13807324-13807958	gga-miR-1754-5p	GID4
6:36302501-36309401	gga-miR-1754-5p	PEMT
6:36302501-36309401	gga-miR-1754-5p	TMEM37
6:36302501-36309401	gga-miR-1754-5p	HRH3
6:36302501-36309401	gga-miR-1754-5p	GID4
10:8044919-8049376	gga-miR-199-3p	TPM2
10:8044919-8049376	gga-miR-199-3p	WBP1L
2:17975751-17985248	gga-miR-204	LCOR
2:17975751-17985248	gga-miR-204	MAP1LC3B
2:17975751-17985248	gga-miR-211	LCOR
2:17975751-17985248	gga-miR-211	MAP1LC3B
3:110013980-110042321	gga-miR-221-3p	ANO5
3:110013980-110042321	gga-miR-221-3p	CD47
3:104232958-104234270	gga-miR-455-3p	IGFBP2
3:104232958-104234270	gga-miR-455-3p	CACNA1C
3:104232958-104234270	gga-miR-455-3p	RGS3
3:104232958-104234270	gga-miR-455-3p	CDK18
3:104232958-104234270	gga-miR-455-3p	TNFSF10
3:104232958-104234270	gga-miR-455-3p	HPCAL1
3:104232958-104234270	gga-miR-455-3p	ORMDL3
3:104232958-104234270	gga-miR-455-3p	SMTN
3:104232958-104234270	gga-miR-455-3p	APCDD1
3:104232958-104234270	gga-miR-455-3p	QSOX2
3:104232958-104234270	gga-miR-455-3p	POU3F3
3:104232958-104234270	gga-miR-455-3p	IRX5
3:104232958-104234270	gga-miR-455-3p	FKBP10
3:104232958-104234270	gga-miR-455-3p	TRPM2
3:104232958-104234270	gga-miR-455-3p	CENPO
3:104232958-104234270	gga-miR-455-3p	GNB5
3:104232958-104234270	gga-miR-455-3p	P3H4
3:104232958-104234270	gga-miR-455-3p	NOTUM
1:79079526-79092394	gga-miR-9-5p	SLC24A4
1:79079526-79092394	gga-miR-9-5p	TOLLIP
1:79079526-79092394	gga-miR-9-5p	NUP50
1:79079526-79092394	gga-miR-9-5p	PLA2G6
20:1404151-1406715	novel_11	ATP11B
20:1404151-1406715	novel_11	IL31RA
20:1404151-1406715	novel_11	ATAD2B
20:1404151-1406715	novel_11	FRYL
20:1404151-1406715	novel_11	HLCS
20:1404151-1406715	novel_11	ACAA2
20:1404151-1406715	novel_11	CLOCK
20:1404151-1406715	novel_11	MYPN
10:12132977-12161781	novel_152	F2RL2
14:13807324-13807958	novel_152	F2RL2
14:6667631-6690566	novel_152	F2RL2
16:2733248-2734870	novel_152	F2RL2
18:4180338-4182886	novel_152	F2RL2
2:120915124-120916022	novel_152	F2RL2
2:17975751-17985248	novel_152	F2RL2
3:107147300-107151497	novel_152	F2RL2
4:5093850-5096145	novel_152	F2RL2
KZ626826.1:7149-7526	novel_152	F2RL2
3:104232958-104234270	novel_163	CACNA1C
3:104232958-104234270	novel_163	MAP2K6
3:104232958-104234270	novel_163	HPCAL1
3:104232958-104234270	novel_163	SCARF2
3:104232958-104234270	novel_163	ADAM33
3:104232958-104234270	novel_163	UNC119B
3:104232958-104234270	novel_163	CERCAM
3:104232958-104234270	novel_163	MSANTD3
3:104232958-104234270	novel_163	HECW2
3:104232958-104234270	novel_163	RASSF8
3:104232958-104234270	novel_163	CENPO
3:104232958-104234270	novel_163	CERS5
3:104232958-104234270	novel_163	GNB5
3:104232958-104234270	novel_163	NOTUM
10:8044919-8049376	novel_178	RGS3
10:8044919-8049376	novel_178	STXBP4
10:8044919-8049376	novel_178	MDFIC
10:8044919-8049376	novel_178	EPB41L4A
10:18596448-18598792	novel_30	CACNA1C
10:18596448-18598792	novel_30	SNTB1
10:18596448-18598792	novel_30	PCDH19
10:18596448-18598792	novel_30	PRR11
10:18596448-18598792	novel_30	LHFPL2
2:120915124-120916022	novel_443	KNSTRN
2:120915124-120916022	novel_443	NEO1
2:120915124-120916022	novel_443	SSBP3
2:120915124-120916022	novel_443	SMTN
2:120915124-120916022	novel_443	SOGA1
2:120915124-120916022	novel_9	HOXB3
2:120915124-120916022	novel_9	ENKD1
